# Supplementary material for: Cu-Catalysed synthesis of benzo[f]indole-2,4,9(3H)-triones by the reaction of 2-amino-1,4-napthoquinones with α-bromocarboxylates
Source: Royal Society of Chemistry journal article supplement (doi:10.1039/d0ob00291g), 2020-01-01
Supplement: d0ob00291g1.pdf [file d0ob00291g1.pdf]

## Supporting Information

### **Cu-catalysed synthesis of benzo[f]indole-2,4,9(3H)-triones by reaction of 2-amino-1,4-naphthoquinones with $\alpha$ -bromocarboxylates**

Fazhou Yang,<sup>a</sup> Ziyang Liu,<sup>a</sup> Hao Liu,<sup>a</sup> Yu Shangguan,<sup>a</sup> Hao Deng,<sup>a</sup> Jiaying Huang,<sup>a</sup> Yumei Xiao,<sup>a</sup> Hongchao Guo<sup>a,b</sup> and Cheng Zhang\*<sup>a</sup>

<sup>a</sup> Department of Applied Chemistry, China Agricultural University, 2 Yuanmingyuan West Road, Beijing 100193, China.

<sup>b</sup> College of public health, Zhengzhou University, Zhengzhou 450001, China

### **Table of Contents**

|                                                                        |            |
|------------------------------------------------------------------------|------------|
| <b>Copies of <sup>1</sup>H NMR and <sup>13</sup>C NMR spectra.....</b> | <b>S1</b>  |
| <b>Single crystallographic data for compound 3aa.....</b>              | <b>S44</b> |

8.325  
8.696  
8.598  
8.391  
8.370  
8.028  
7.939  
7.934  
7.908  
7.862  
7.857  
7.831  
7.819  
7.798  
7.794  
7.786  
7.786  
7.761  
7.467  
7.451  
7.423  
6.058

$^1\text{H}$  NMR in  $\text{DMSO-}d_6$  for **1n**

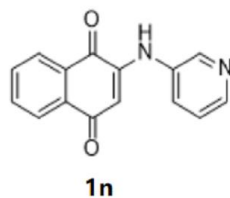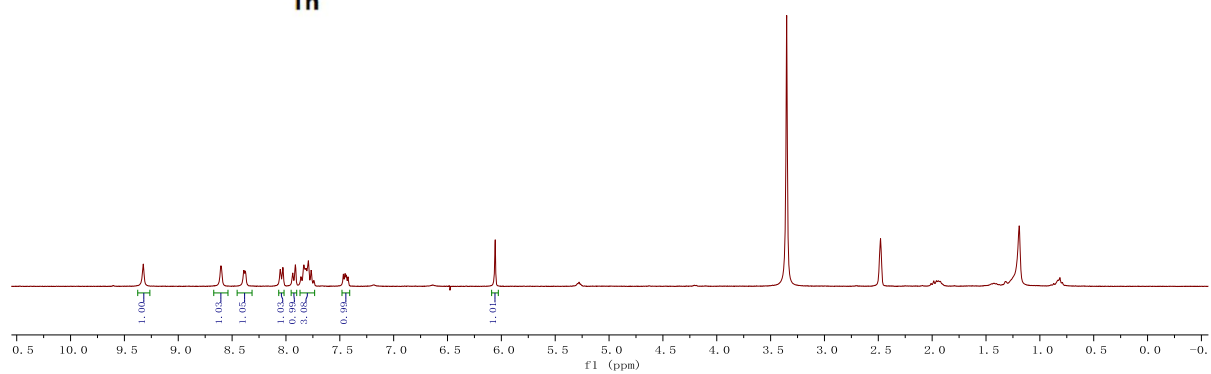

182.835  
181.427  
146.305  
146.004  
145.444  
135.027  
132.576  
130.843  
130.512  
126.278  
125.445  
124.051  
102.823

$^{13}\text{C}$  NMR in  $\text{DMSO-}d_6$  for **1n**

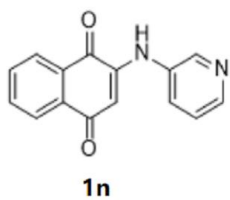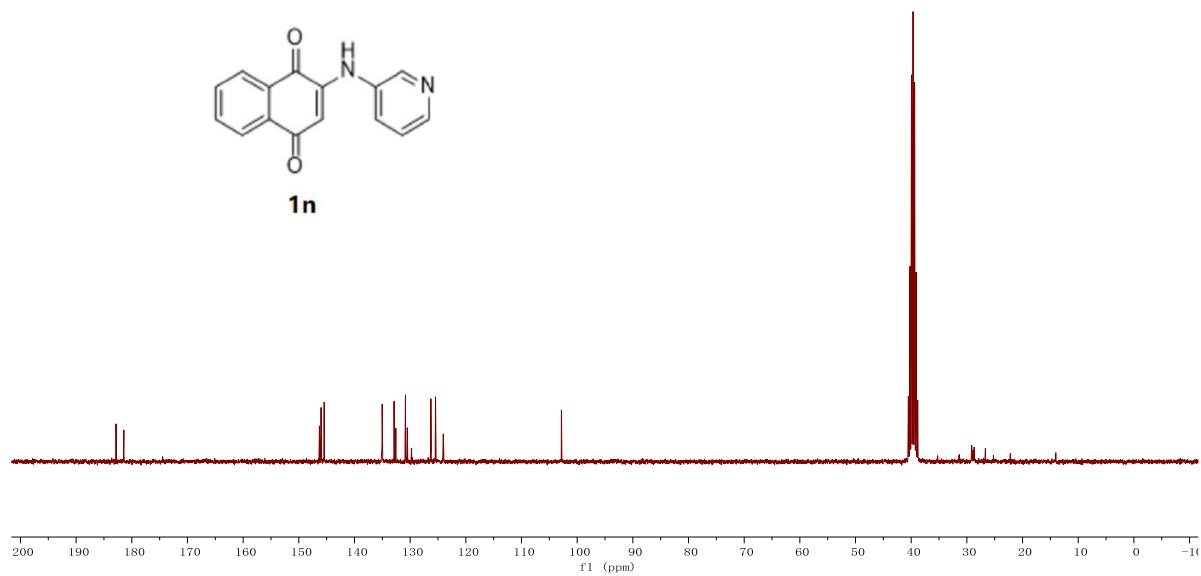

8.879  
8.873  
8.865  
8.858  
8.850  
8.820  
8.818  
8.813  
8.809  
8.807  
8.806  
8.805  
8.800  
8.888  
8.884  
8.879  
8.877  
8.851  
8.831  
7.777  
7.772  
7.772  
7.767  
7.747  
7.727  
7.722  
7.722  
7.675  
7.679  
7.658  
7.654  
7.653  
7.659  
7.652  
7.582  
7.561  
7.552  
7.552  
7.425  
7.411  
7.411  
7.397  
1.0397

<sup>1</sup>H NMR in CDCl<sub>3</sub> for **1o**

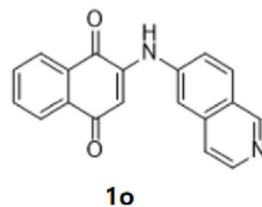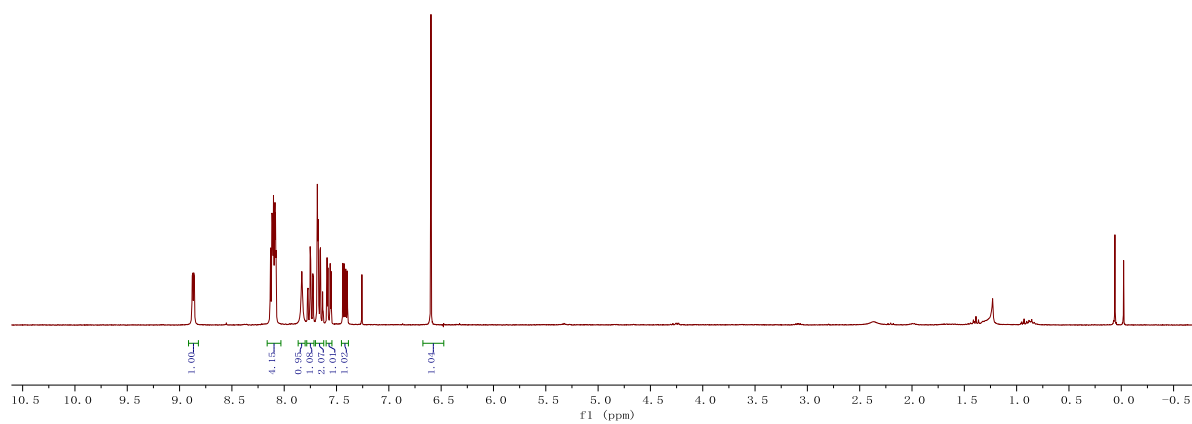

183.668  
151.492  
149.821  
145.099  
143.752  
135.375  
135.125  
134.674  
132.535  
132.235  
131.003  
129.951  
128.298  
125.891  
124.897  
117.842  
103.915

<sup>13</sup>C NMR in CDCl<sub>3</sub> for **1o**

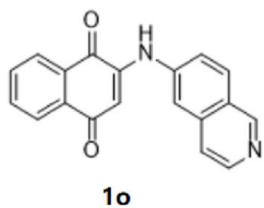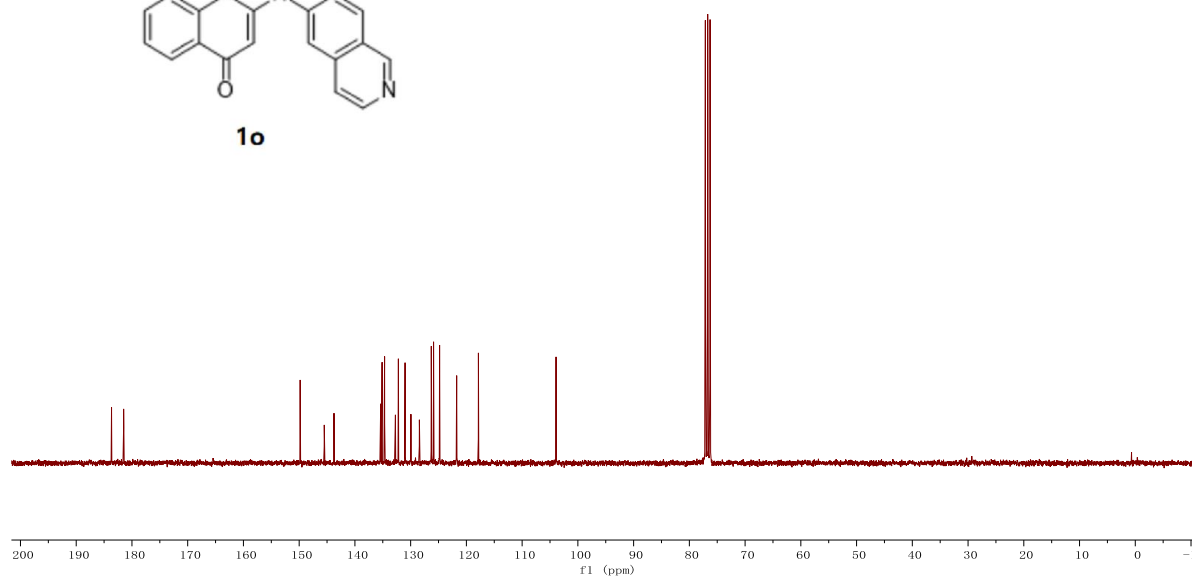

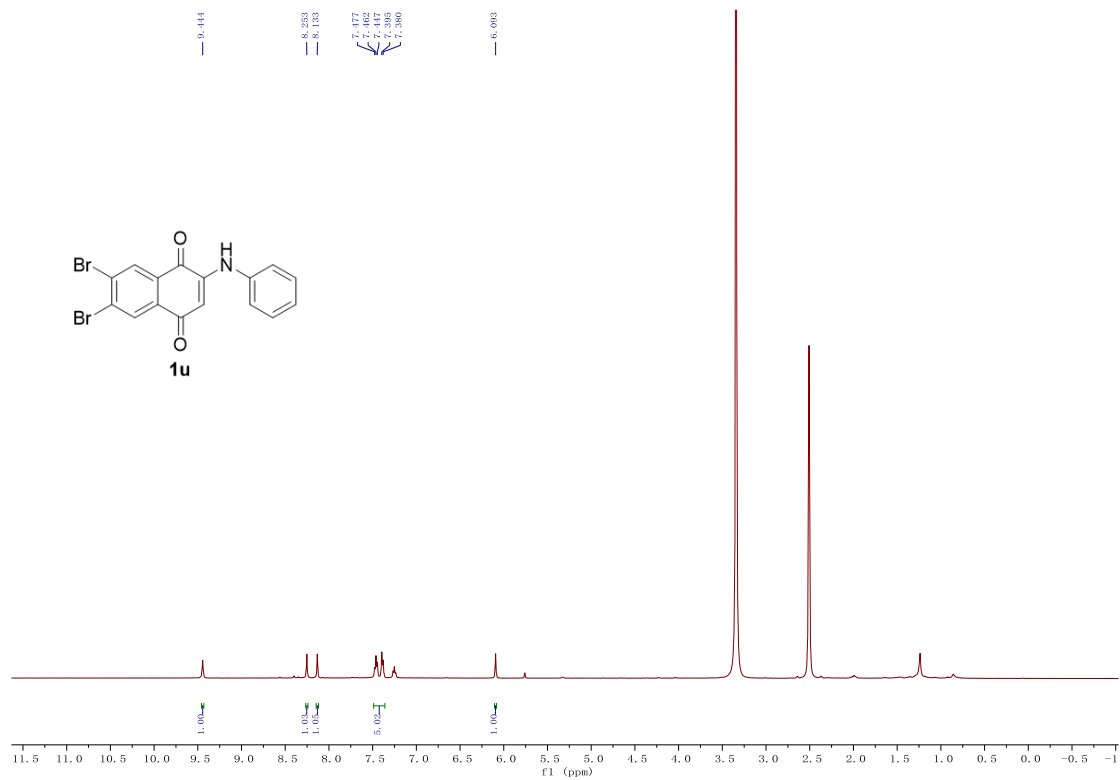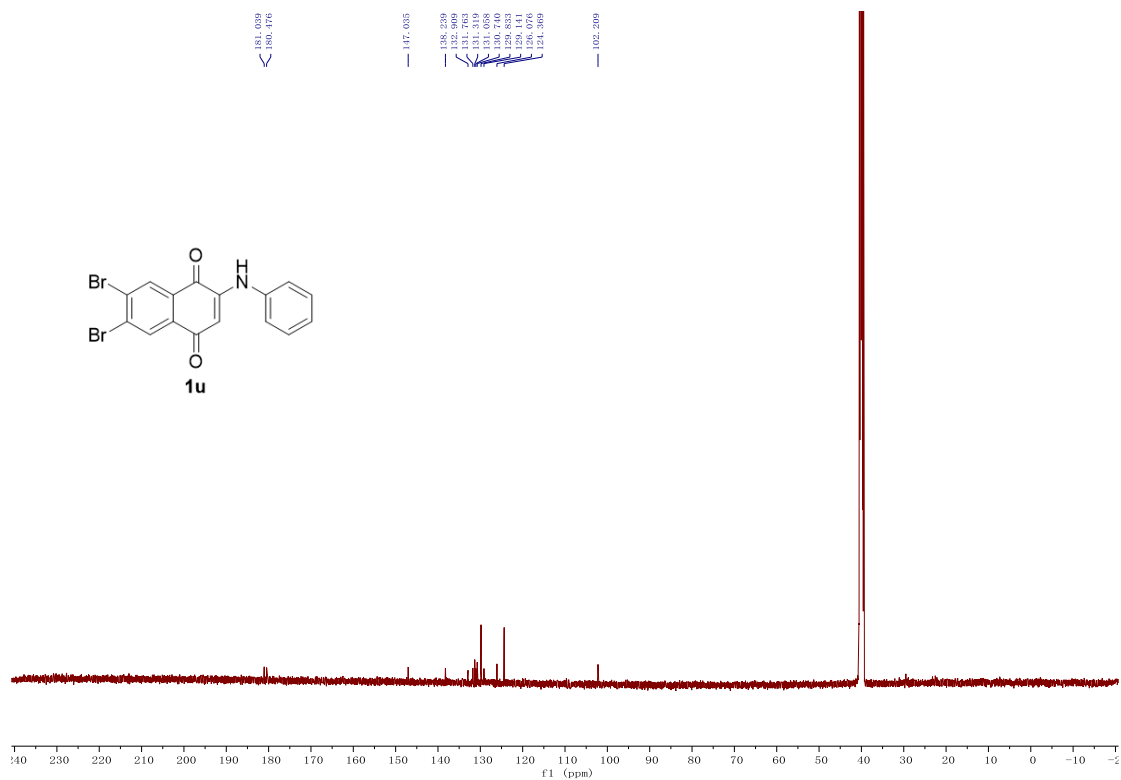

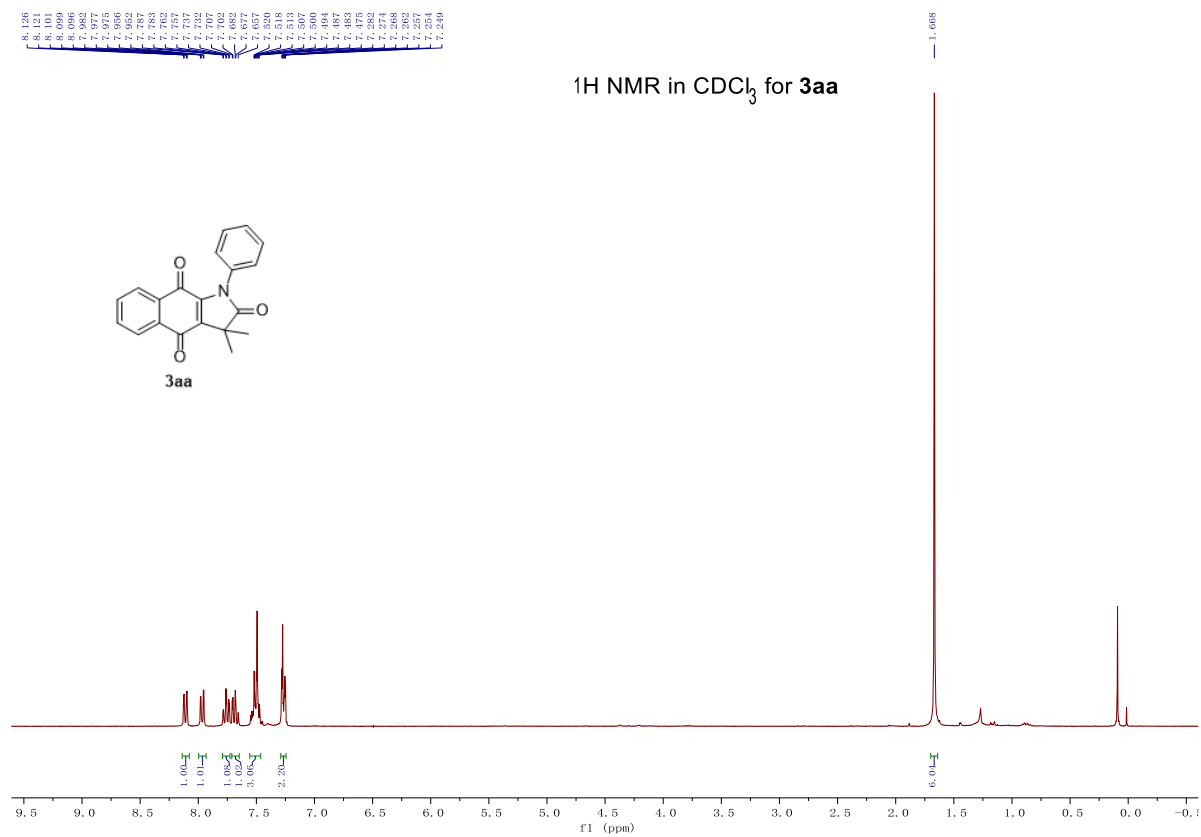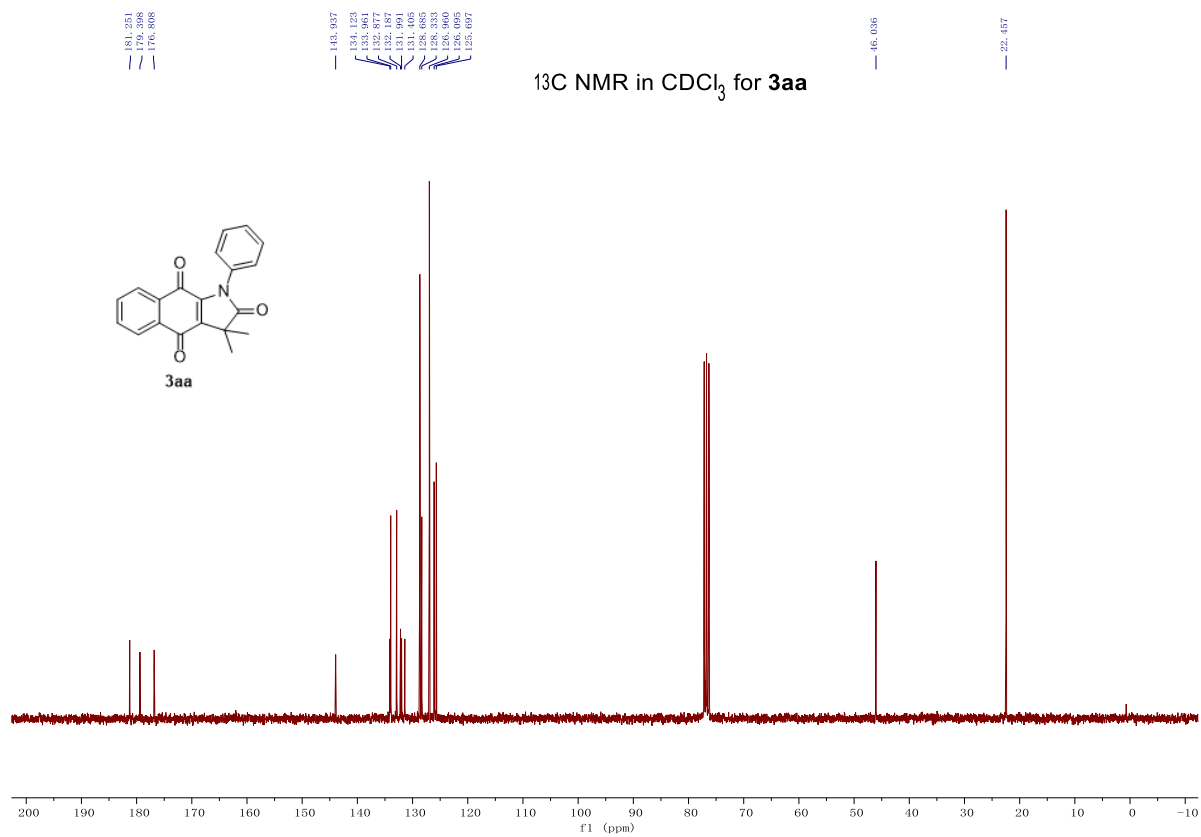

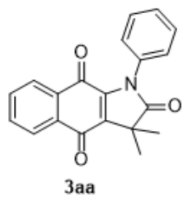

IR (KBr) spectrum of compound **3aa**

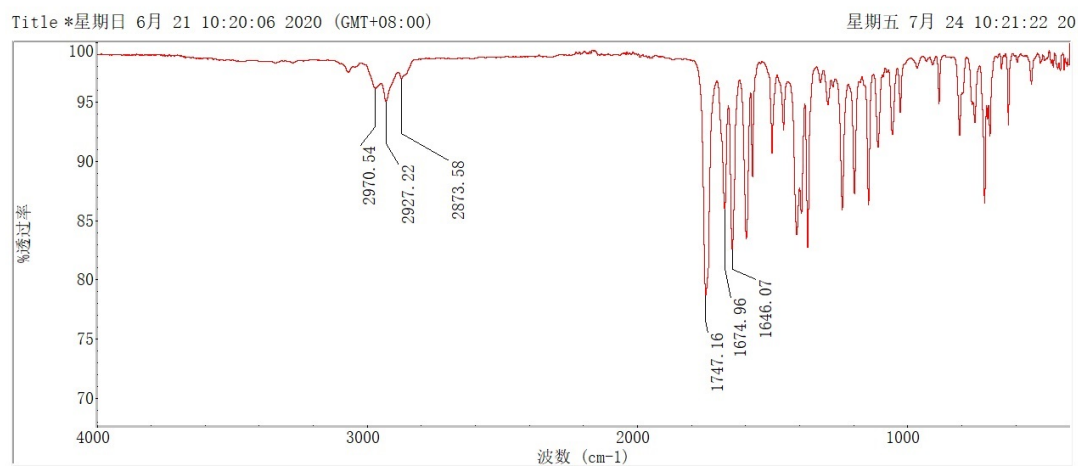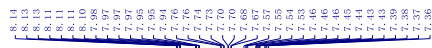

<sup>1</sup>H NMR in CDCl<sub>3</sub> for **3ba**

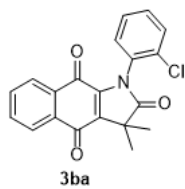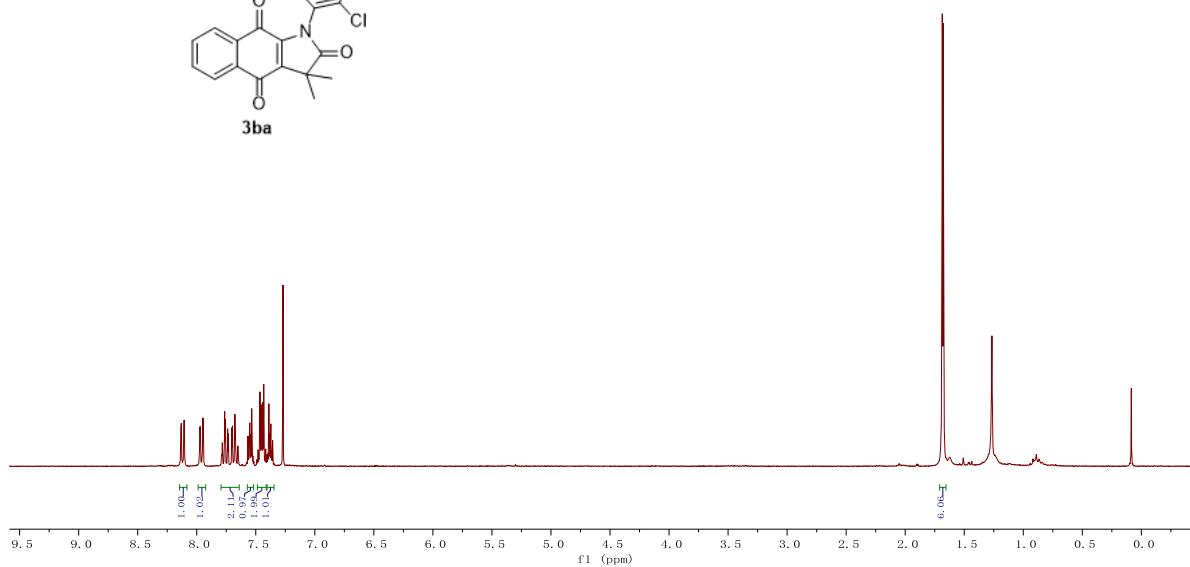

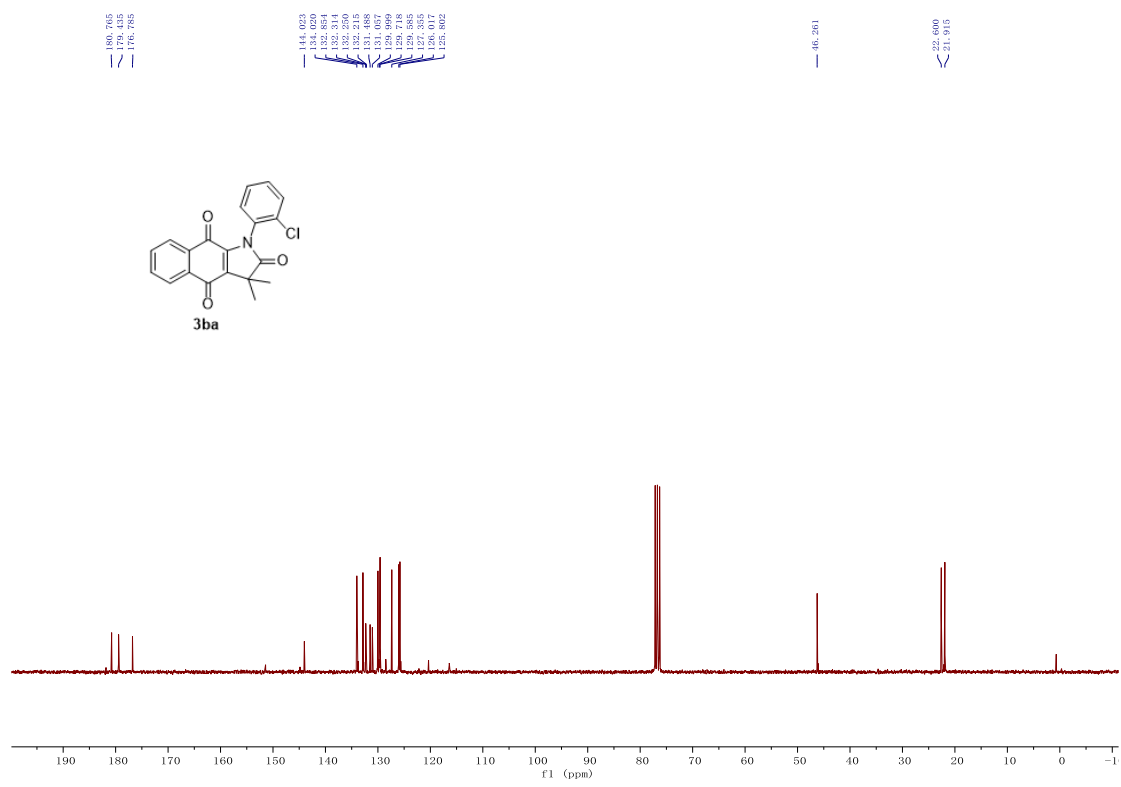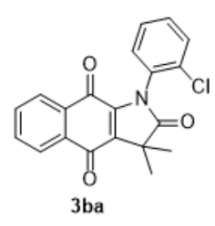

IR (KBr) spectrum of compound **3ba**

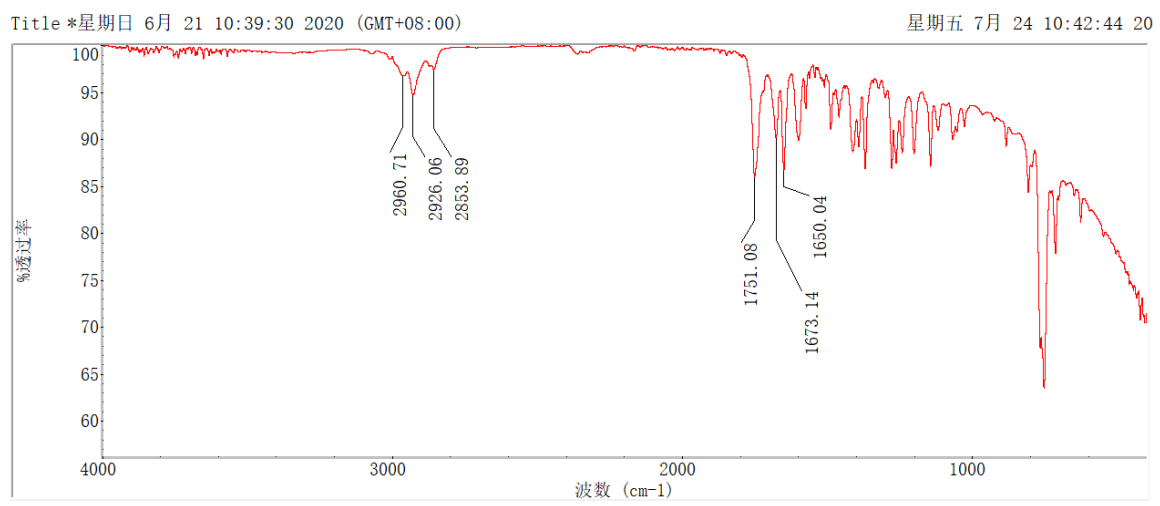

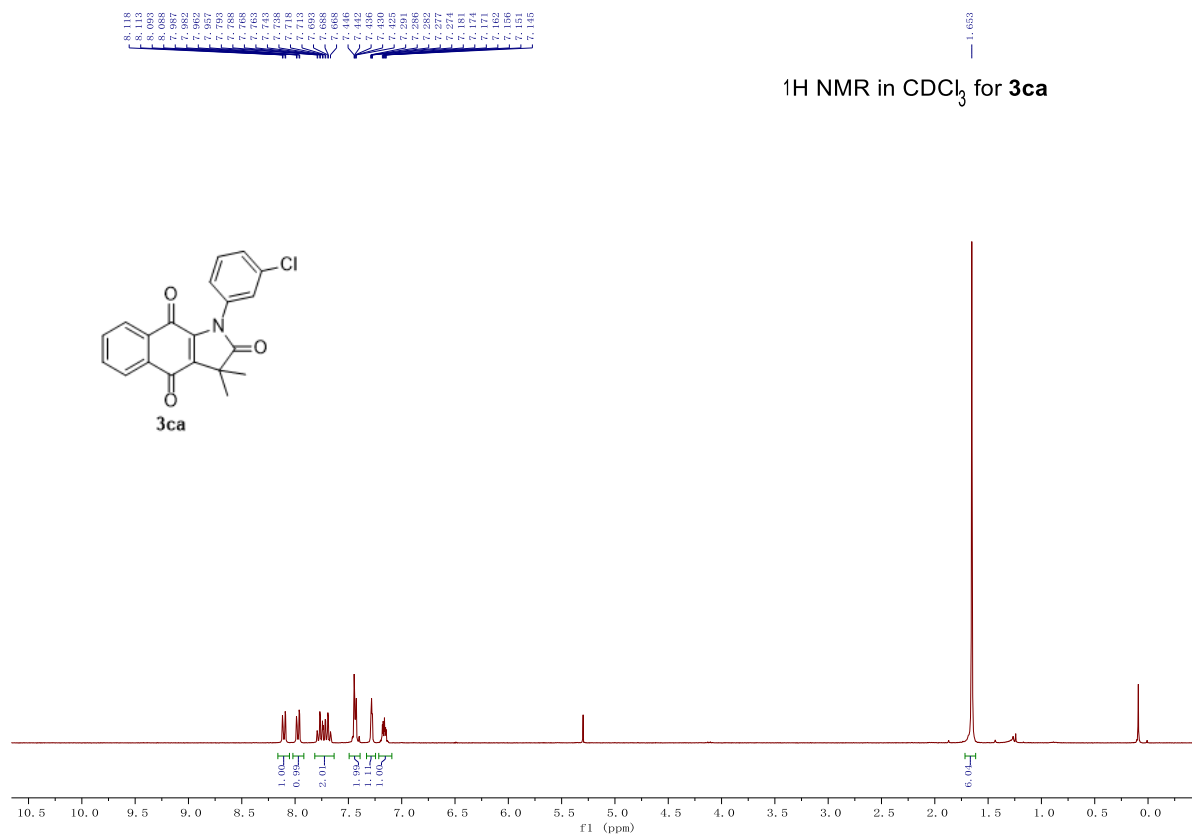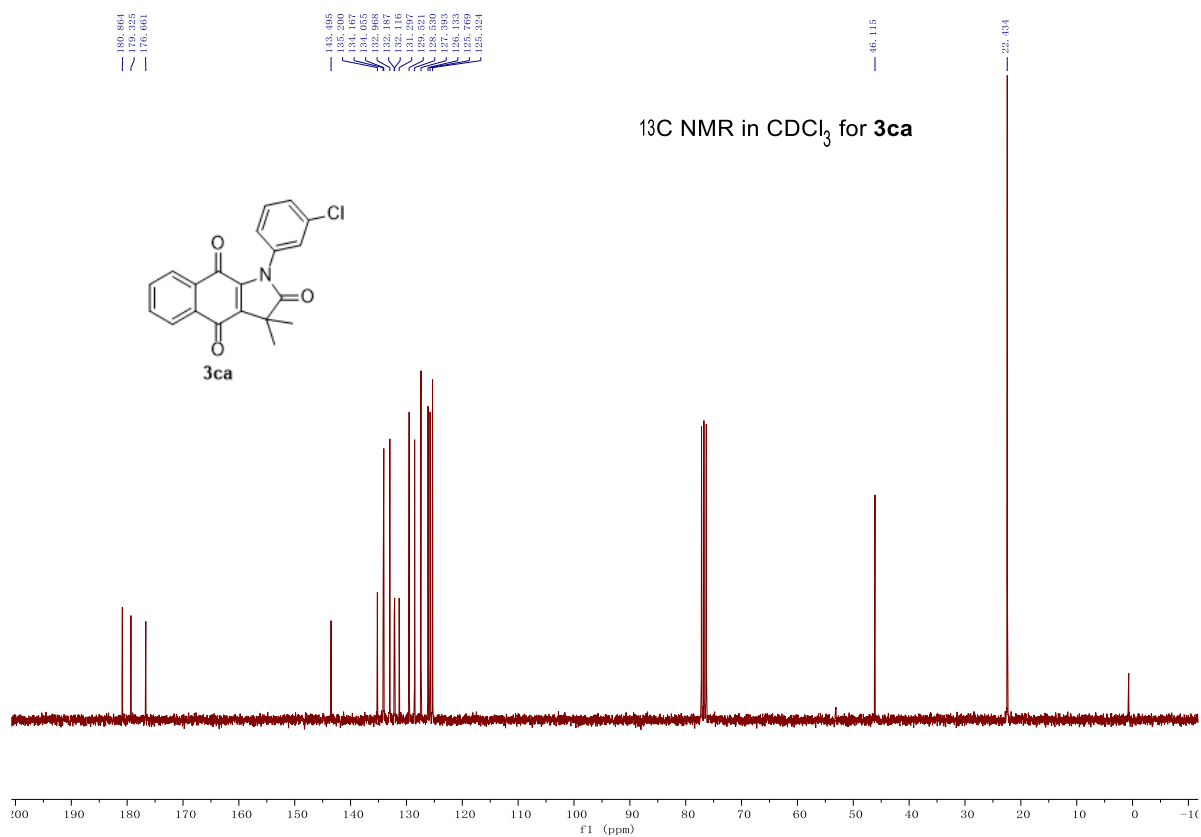



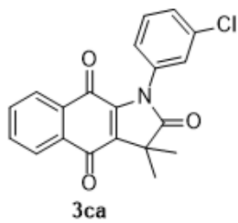

IR (KBr) spectrum for compound **3ca**

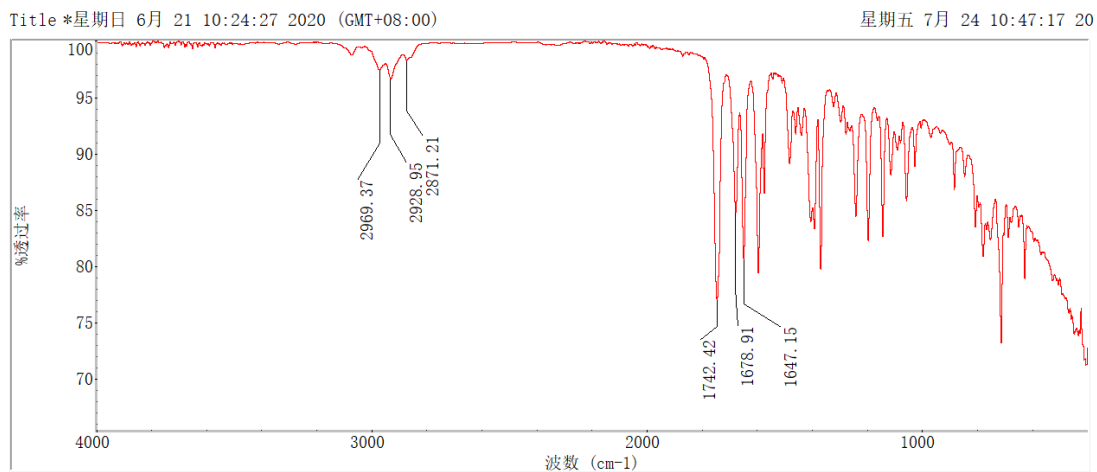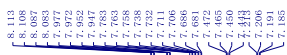

<sup>1</sup>H NMR in CDCl<sub>3</sub> for **3da**

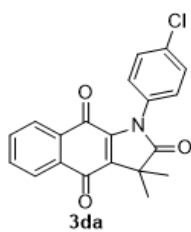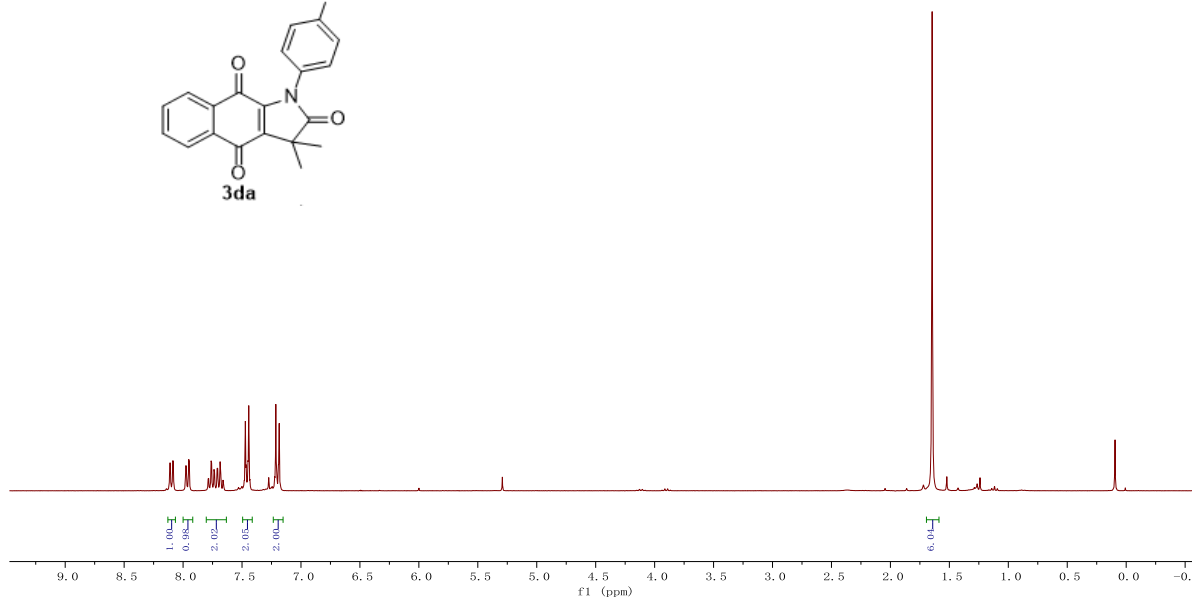

181.006  
179.299  
176.792

145.532  
134.102  
133.972  
132.959  
132.601  
132.195  
131.309  
128.860  
126.964  
125.763

46.063  
22.431  
**<sup>13</sup>C NMR in CDCl<sub>3</sub> for 3da**

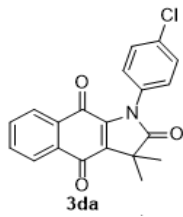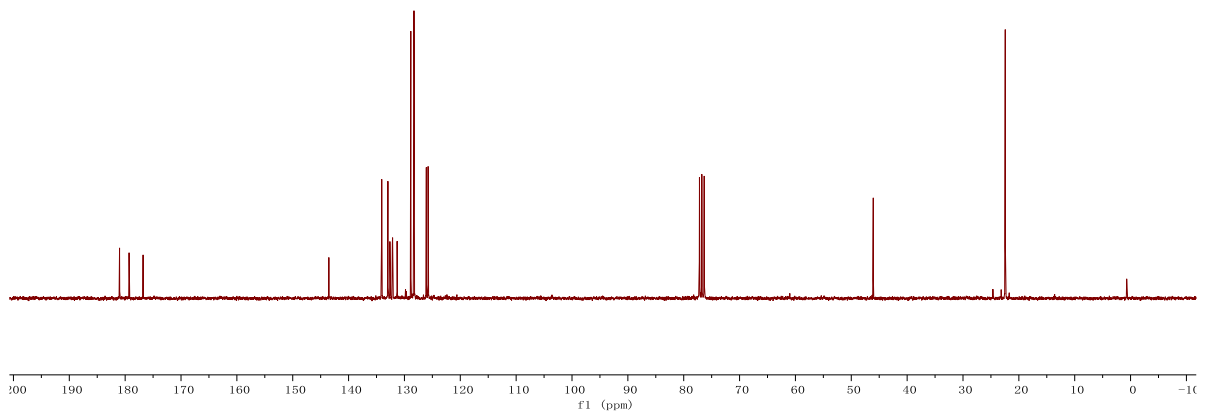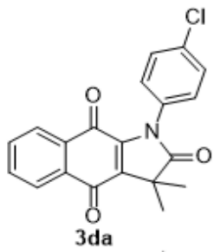

IR (KBr) spectrum for compound  
**3da**

Title \*星期日 6月 21 10:22:23 2020 (GMT+08:00)

星期五 7月 24 10:51:15 20

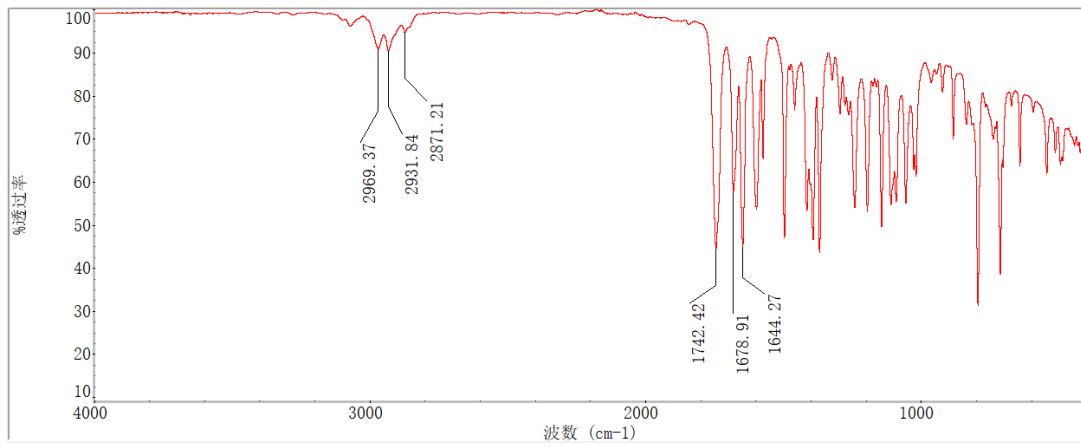

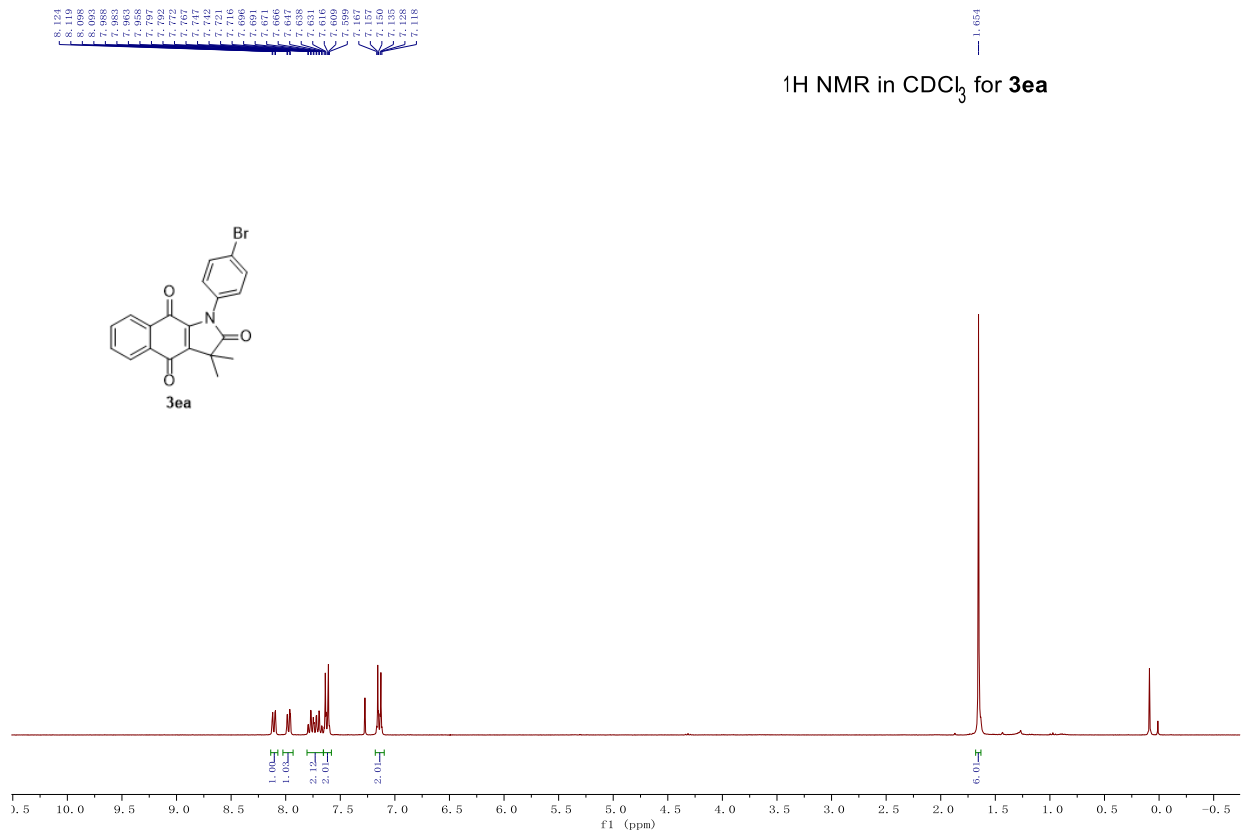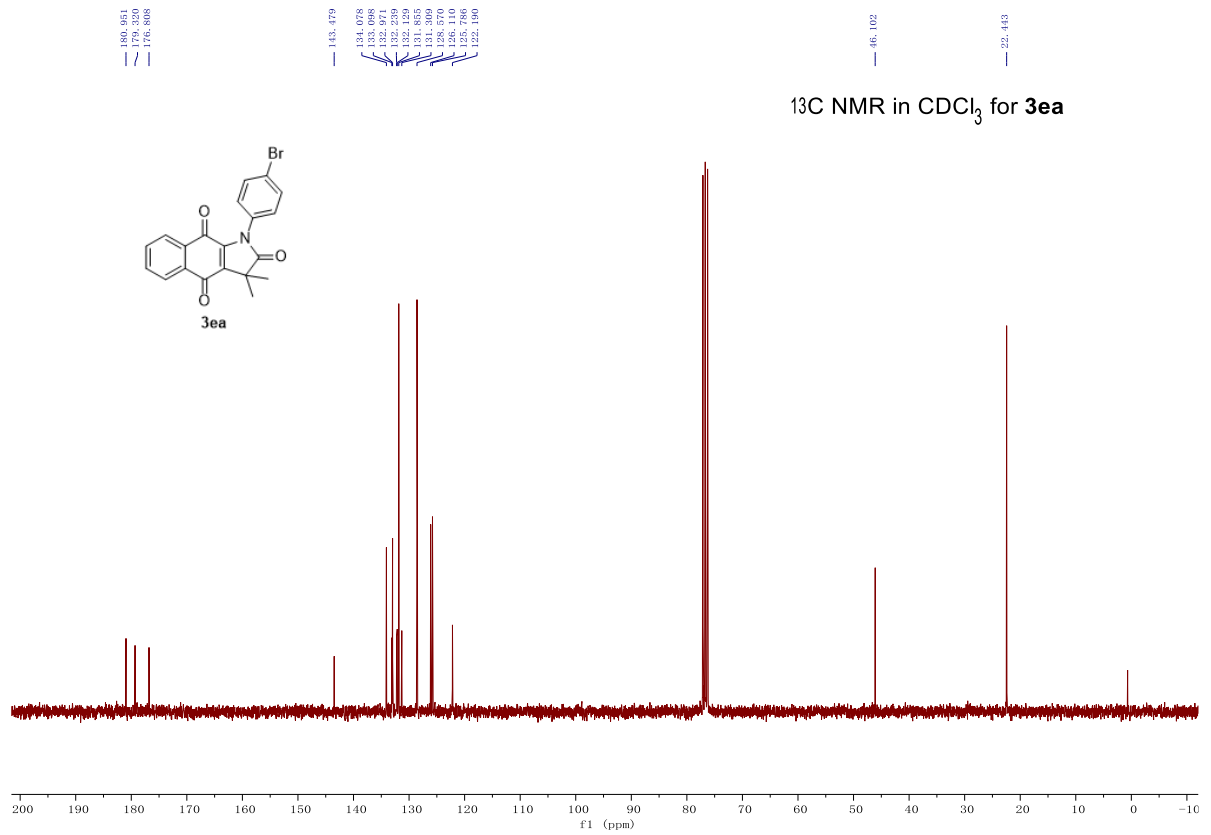

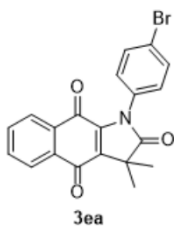

IR (KBr) spectrum for compound **3ea**

Title \*星期日 6月 21 10:43:15 2020 (GMT+08:00)

星期五 7月 24 10:54:15 20

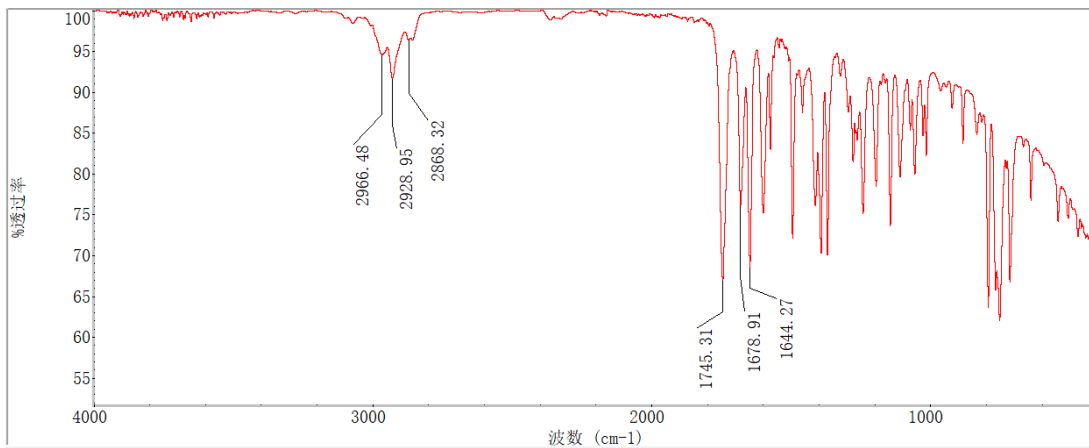

8.137  
8.122  
8.107  
7.985  
7.980  
7.965  
7.796  
7.791  
7.766  
7.746  
7.718  
7.713  
7.693  
7.688  
7.664  
7.574  
7.559  
7.537  
7.514  
7.487

1.659

<sup>1</sup>H NMR in CDCl<sub>3</sub> for **3fa**

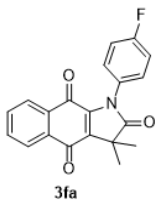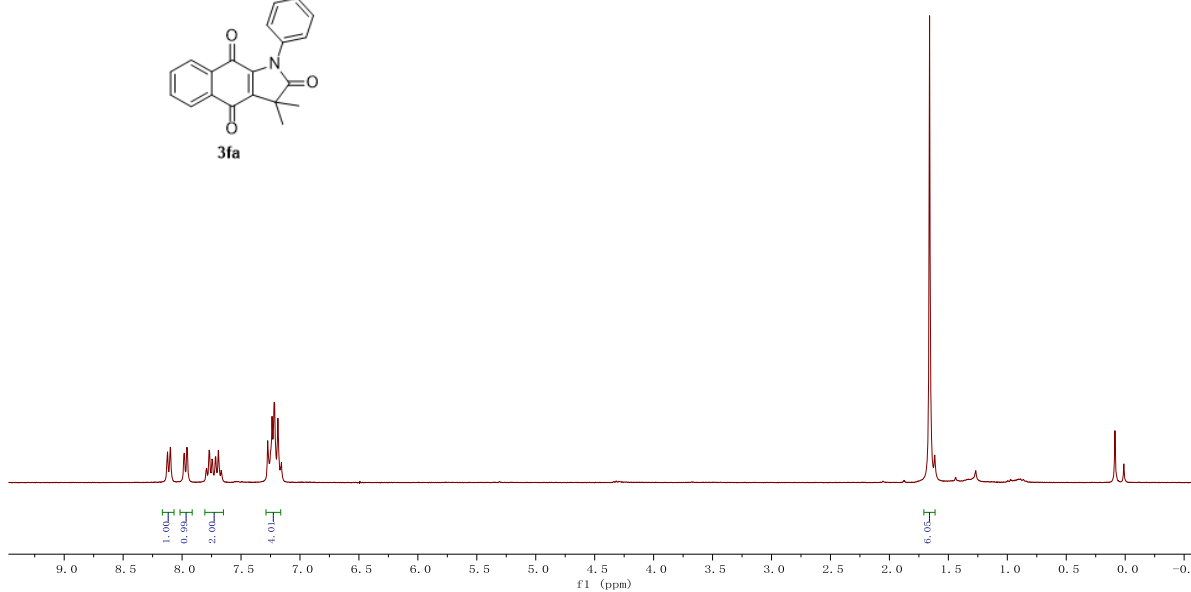

181.274  
179.335  
176.866  
165.673  
160.381  
145.639  
134.037  
133.726  
132.119  
132.013  
131.822  
130.023  
129.998  
128.869  
128.672  
126.068  
125.751  
115.850  
115.544

45.985  
22.430

$^{13}\text{C}$ NMR in  $\text{CDCl}_3$  for **3fa**

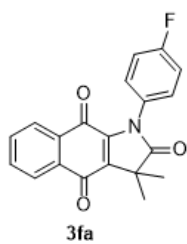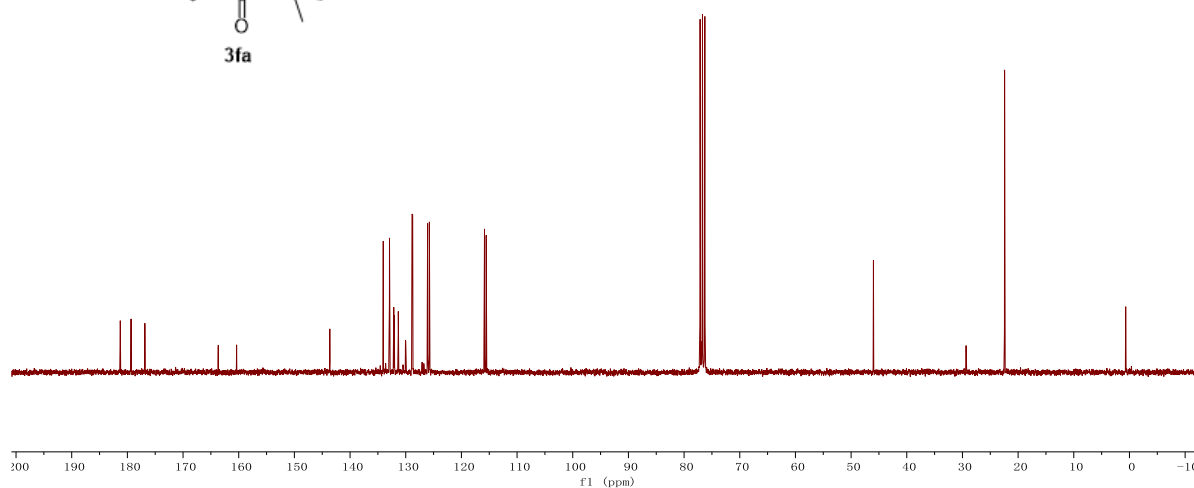

$^{19}\text{F}$  NMR in  $\text{CDCl}_3$  for **3fa**

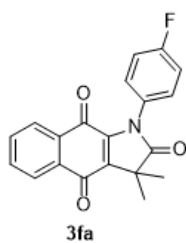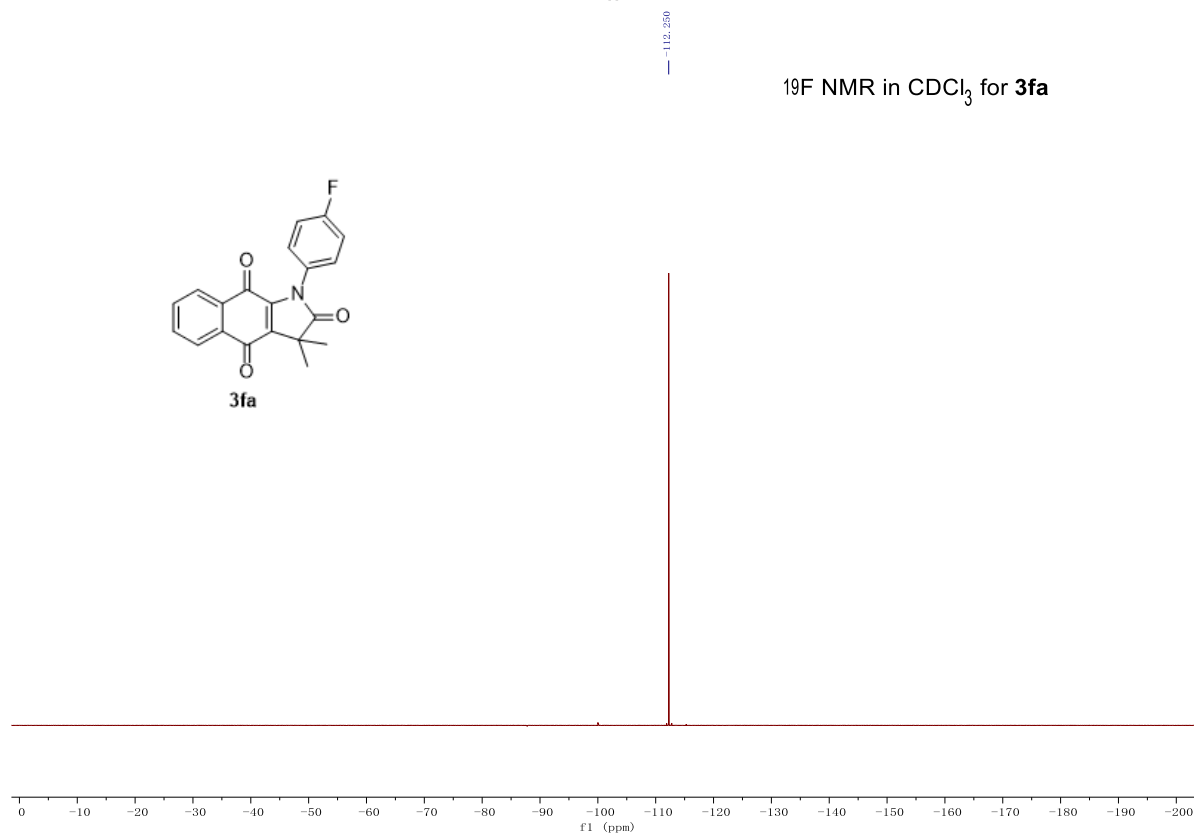

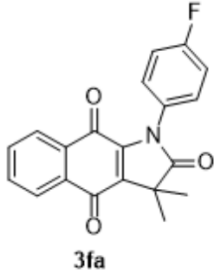

IR (KBr) spectrum for compound **3fa**

Title \*星期日 6月 21 10:41:13 2020 (GMT+08:00)

星期五 7月 24 10:57:21 20

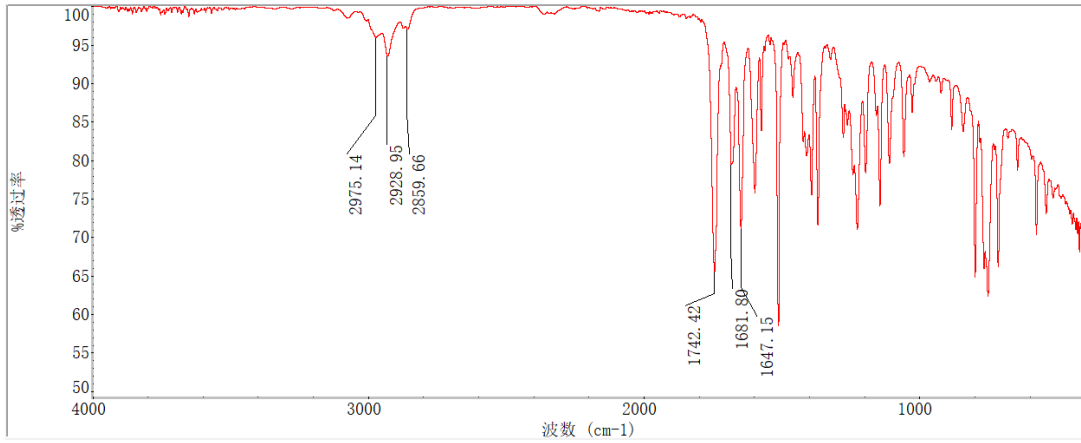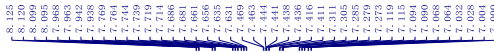

3.731

1.669  
1.646

$^1\text{H}$  NMR in  $\text{CDCl}_3$  for **3ga**

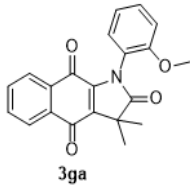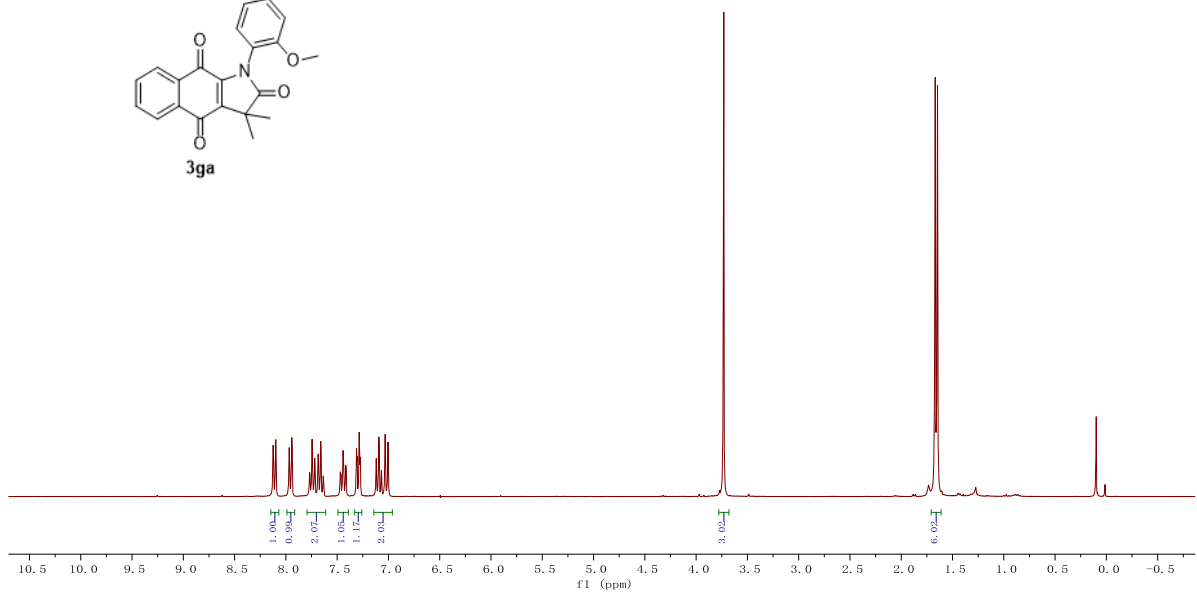

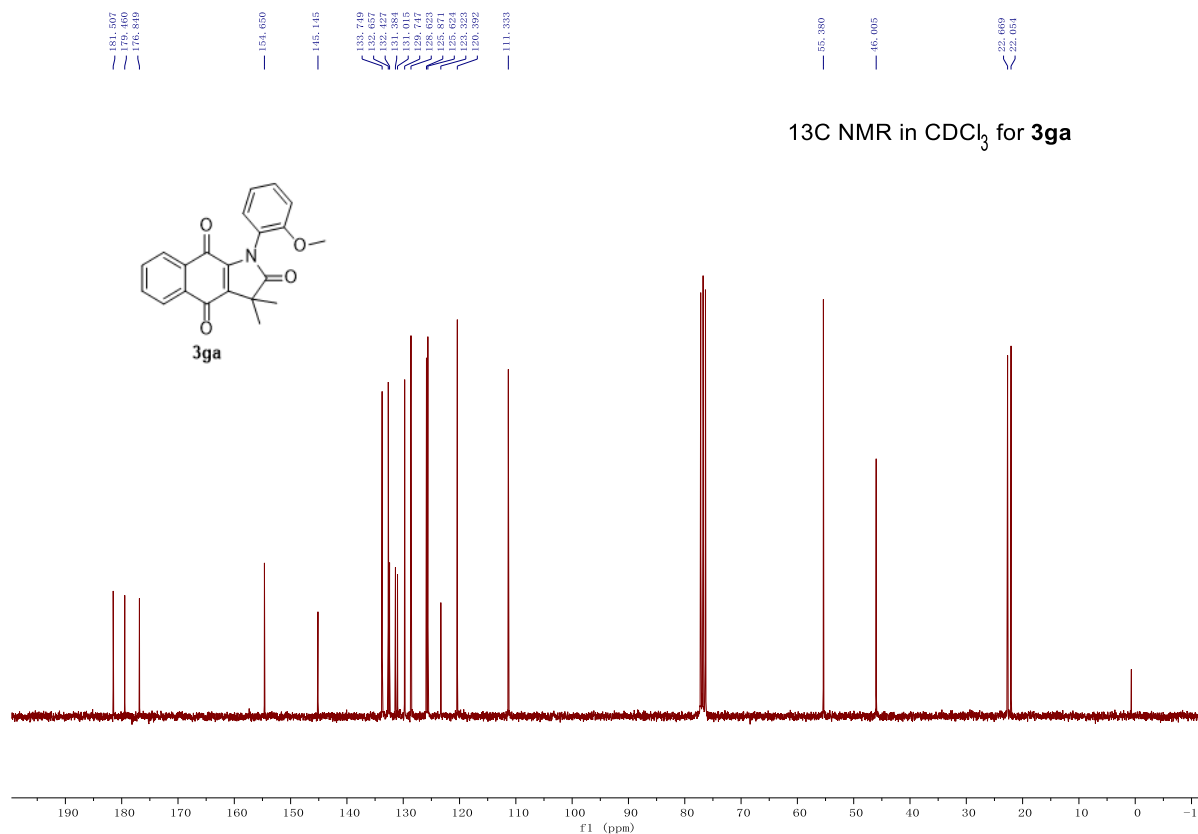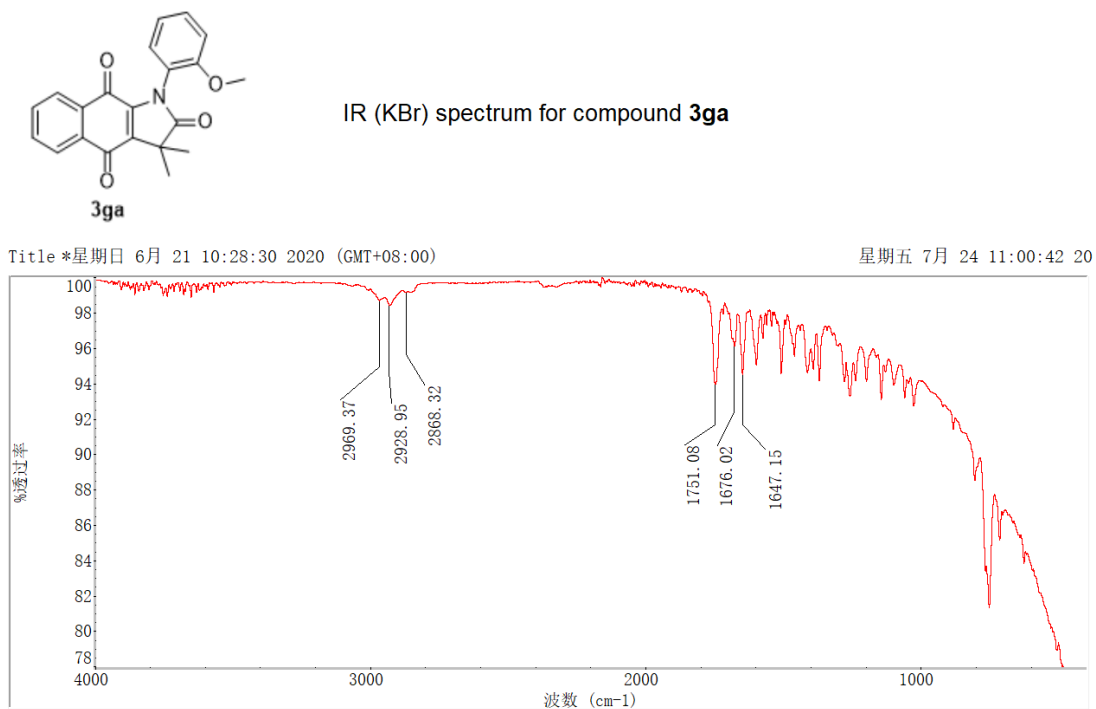

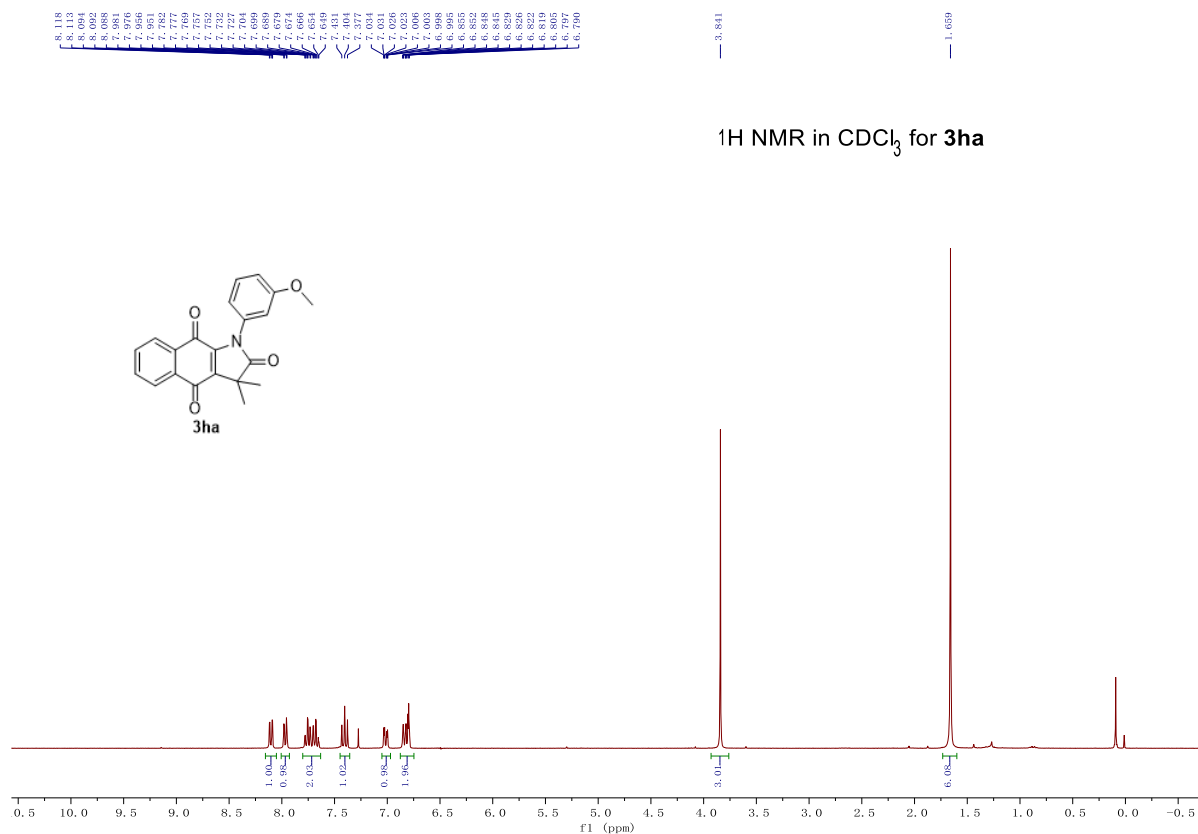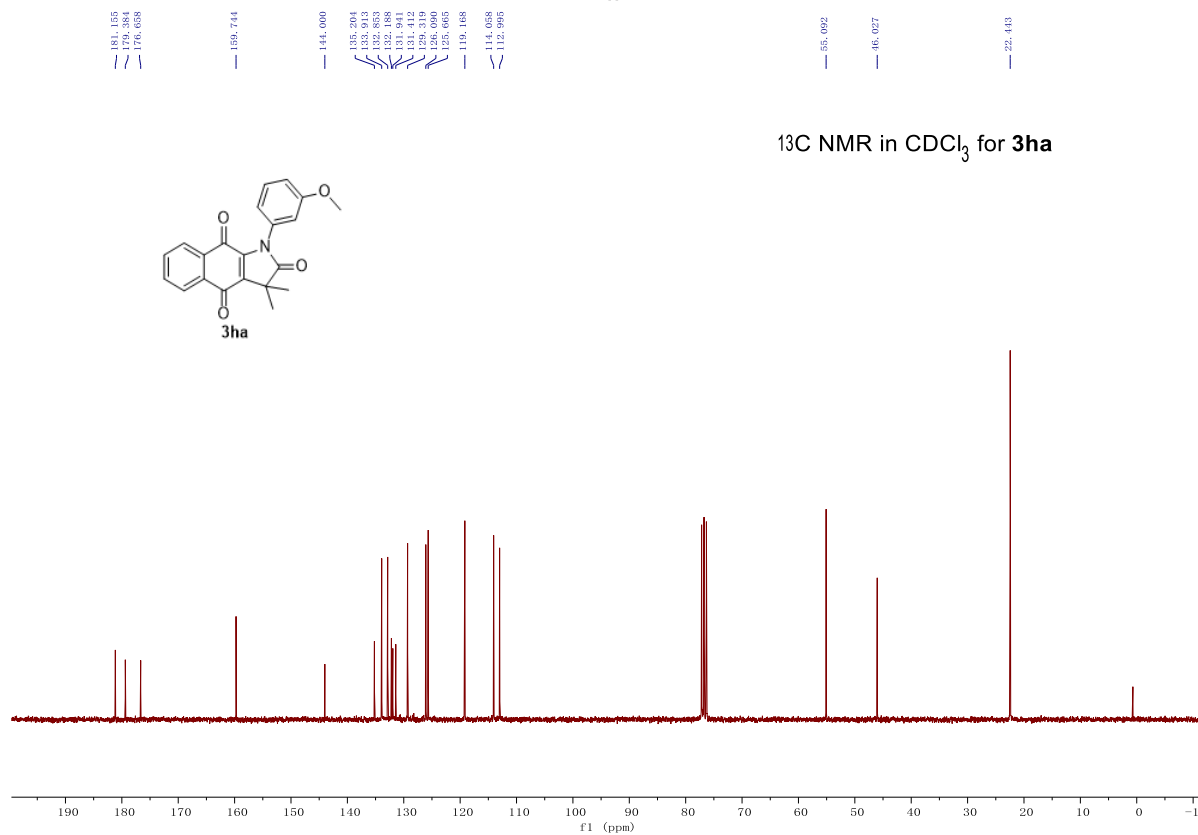



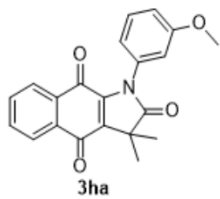

IR (KBr) spectrum for compound **3ha**

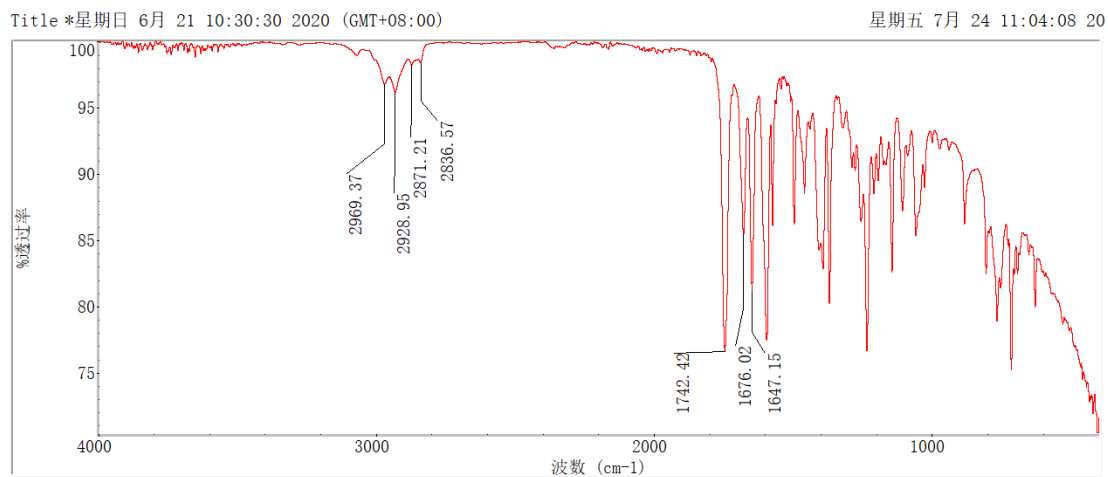

8.106  
8.106  
8.083  
8.078  
7.968  
7.968  
7.948  
7.943  
7.749  
7.749  
7.724  
7.724  
7.694  
7.694  
7.664  
7.664  
7.189  
7.182  
7.057  
7.019  
7.011  
6.989

3.867

1.646

<sup>1</sup>H NMR in CDCl<sub>3</sub> for **3ia**

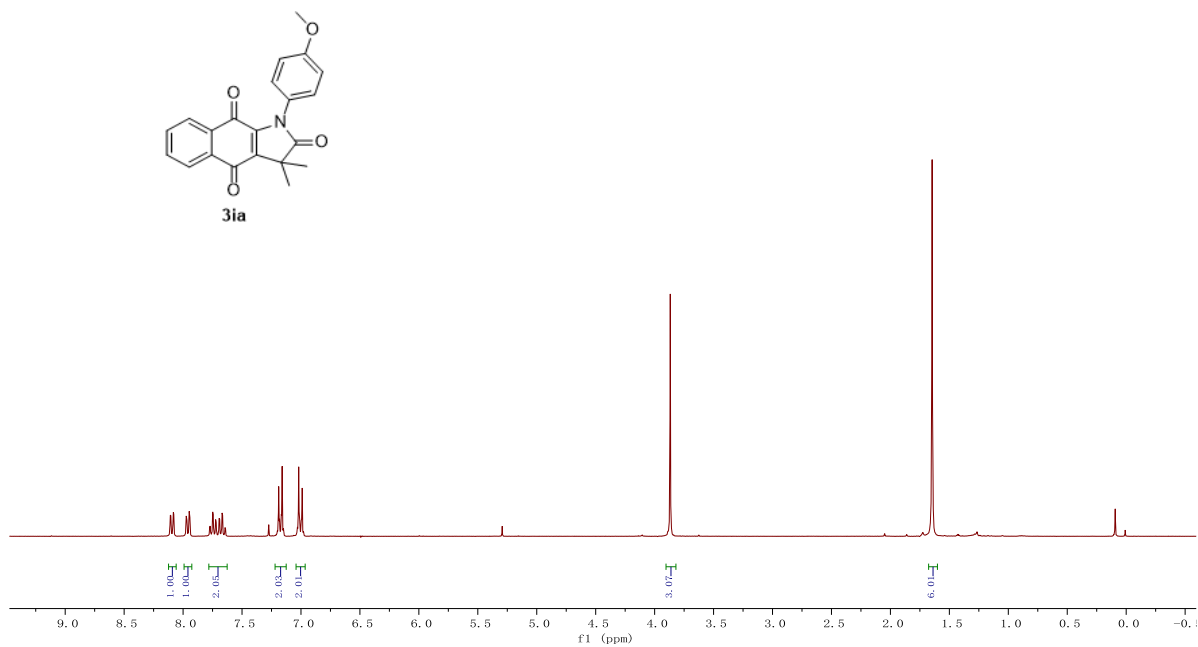

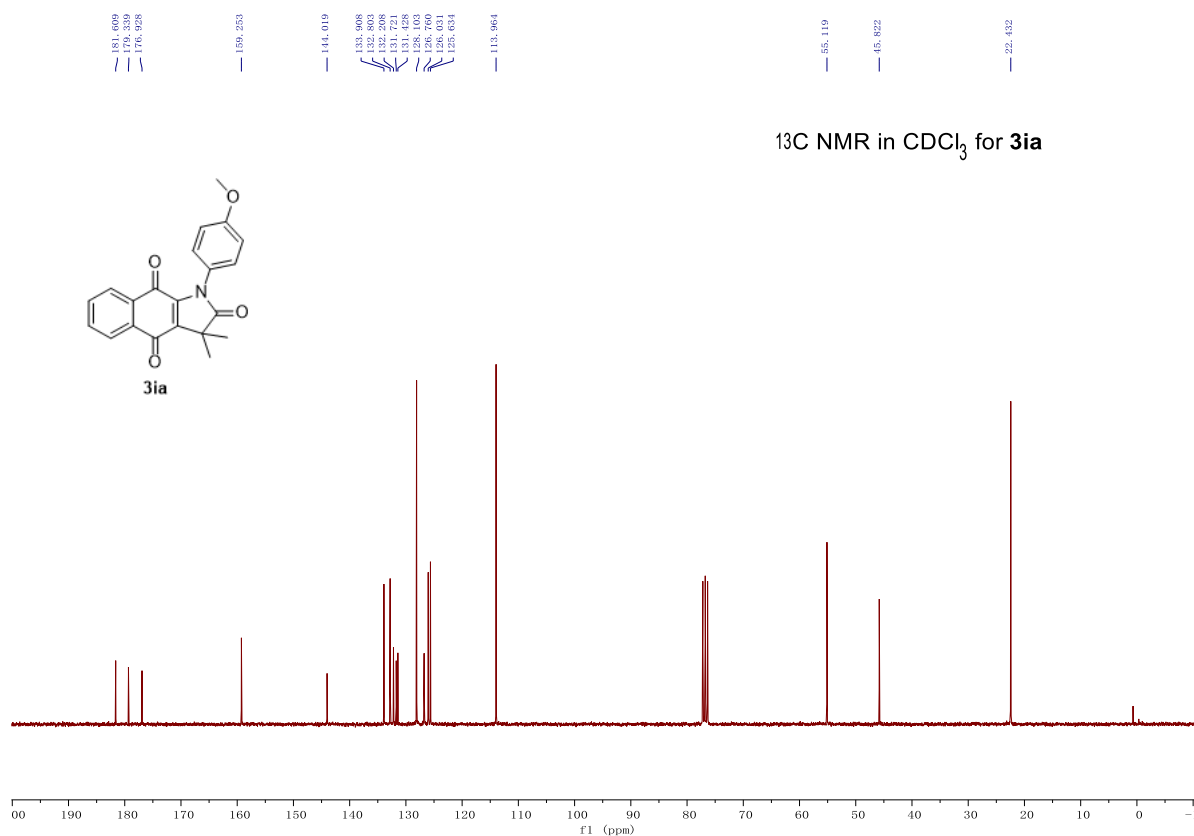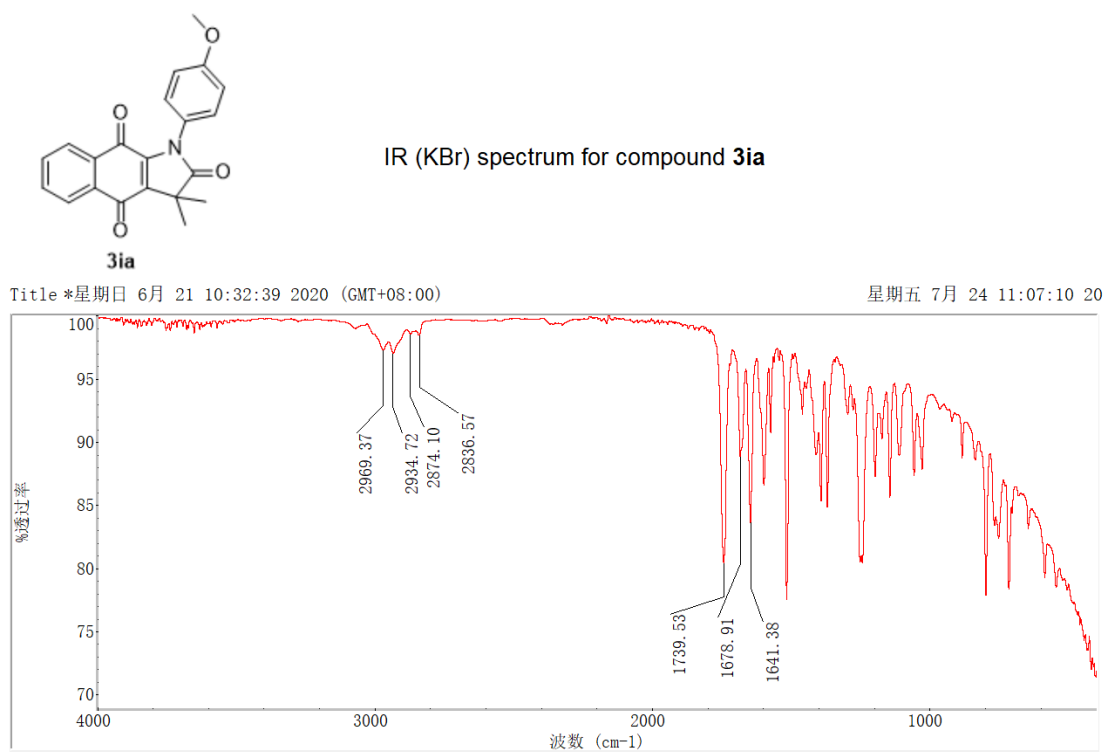

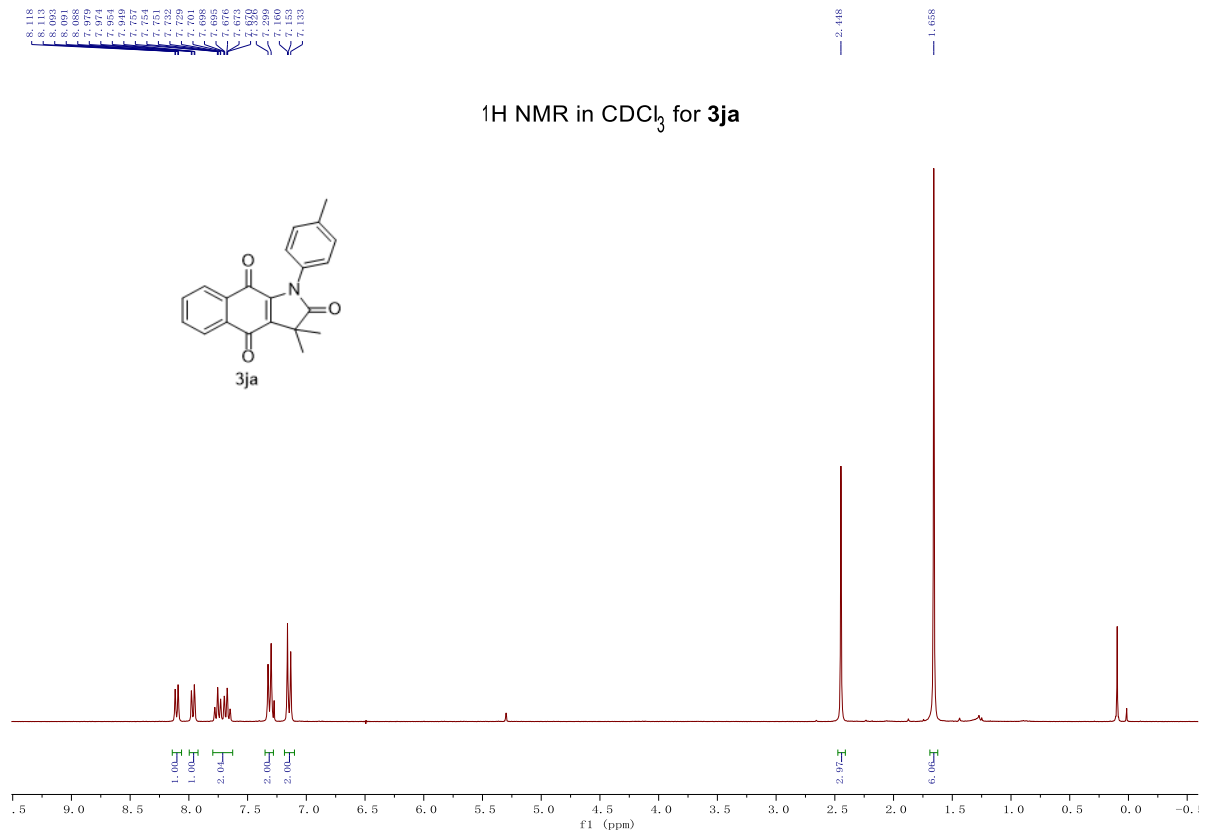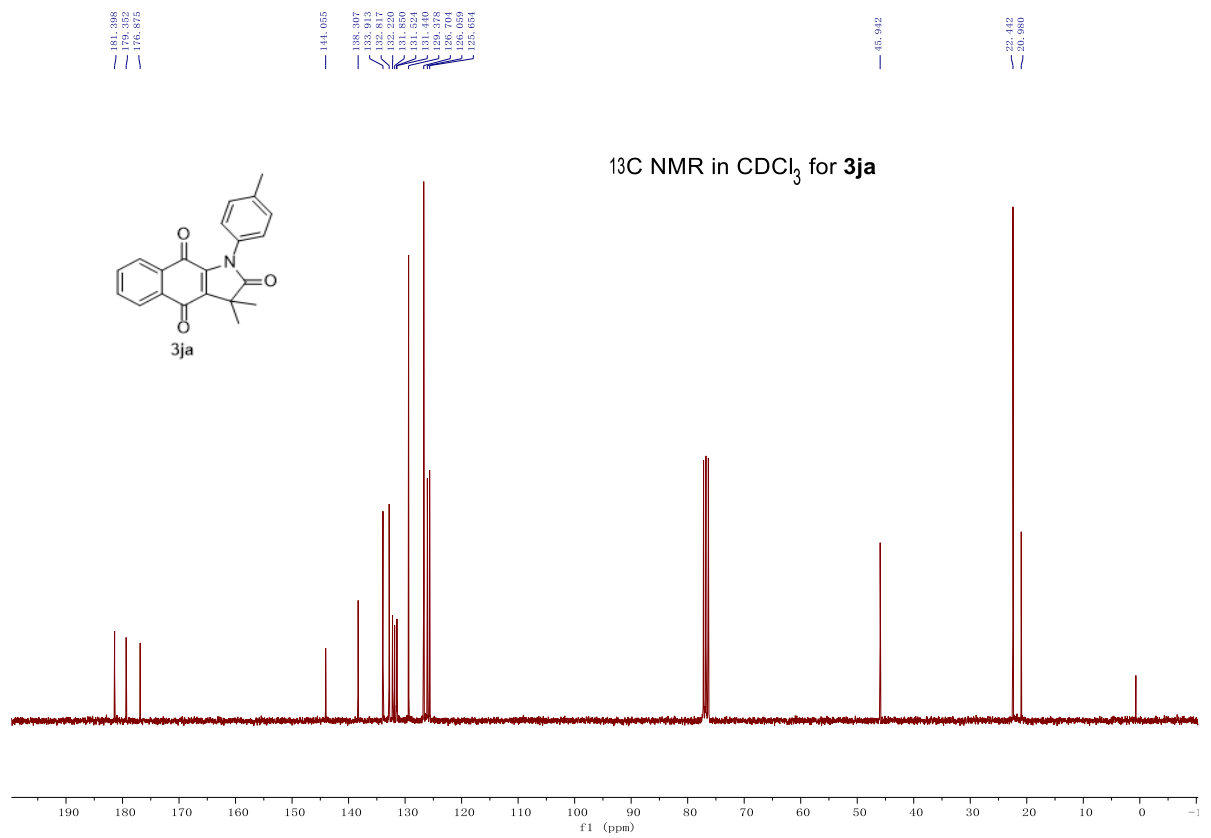

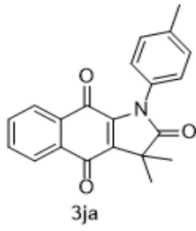

IR (KBr) spectrum for compound **3ja**

Title \*星期日 6月 21 10:26:28 2020 (GMT+08:00)

星期五 7月 24 11:09:56 20

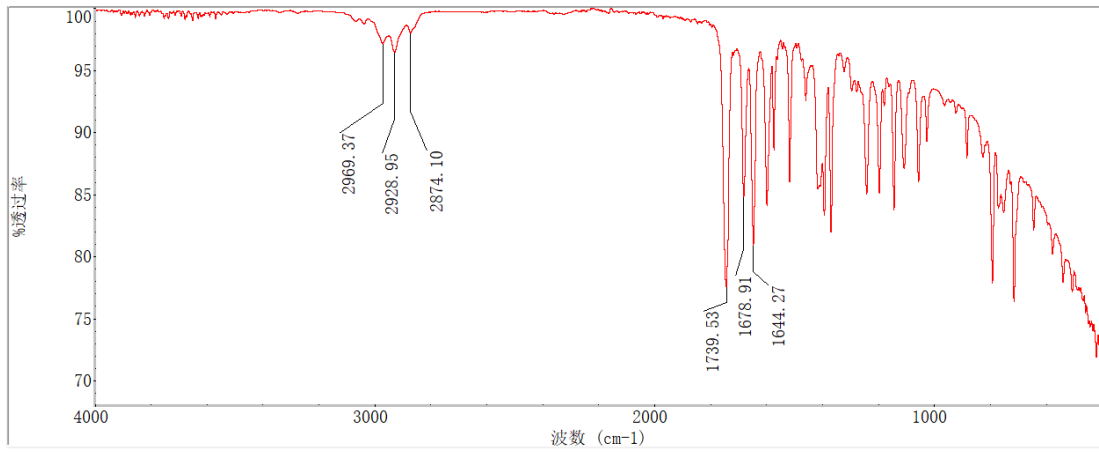

8.131  
8.129  
8.101  
7.994  
7.989  
7.964  
7.868  
7.863  
7.778  
7.772  
7.753  
7.748  
7.732  
7.722  
7.707  
7.702  
7.687  
7.677  
7.614  
7.387

1.672

<sup>1</sup>H NMR in CDCl<sub>3</sub> for **3ka**

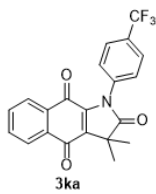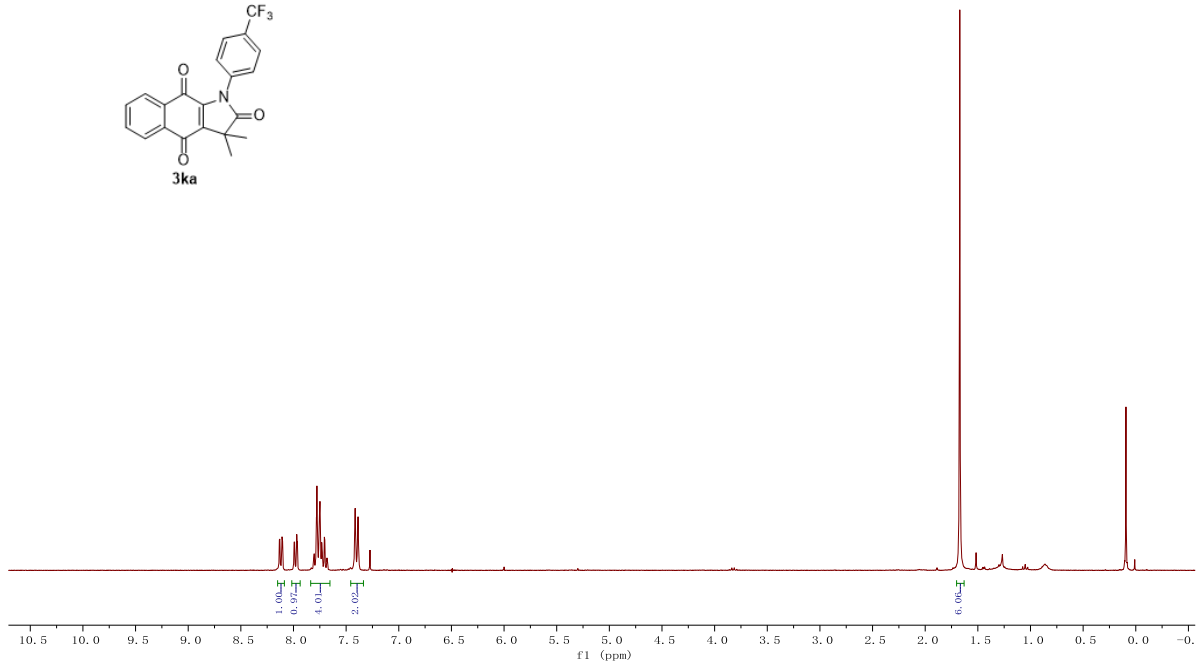

186.733  
178.306  
176.744

145.324  
137.193  
134.142  
133.142  
132.595  
132.100  
131.890  
130.378  
129.941  
129.909  
127.322  
126.128  
125.791  
125.742  
125.692  
125.257  
124.688  
118.039

46.247

22.444

$^{13}\text{C}$  NMR in  $\text{CDCl}_3$  for **3ka**

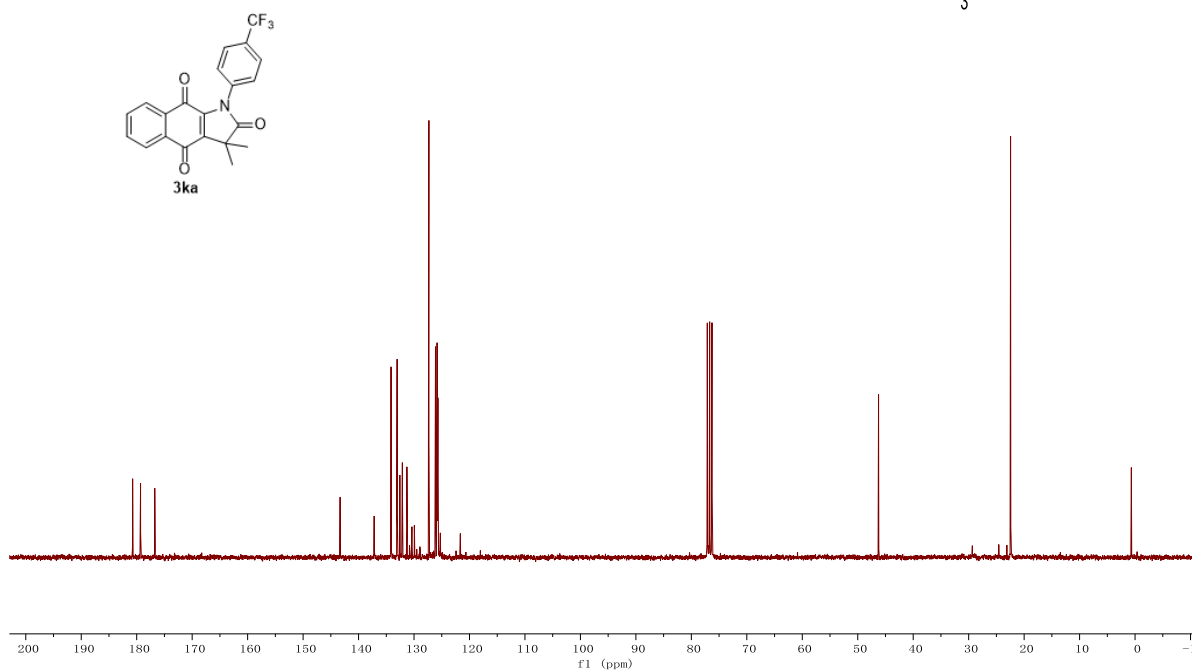

-62.503

$^{19}\text{F}$  NMR in  $\text{CDCl}_3$  for **3ka**

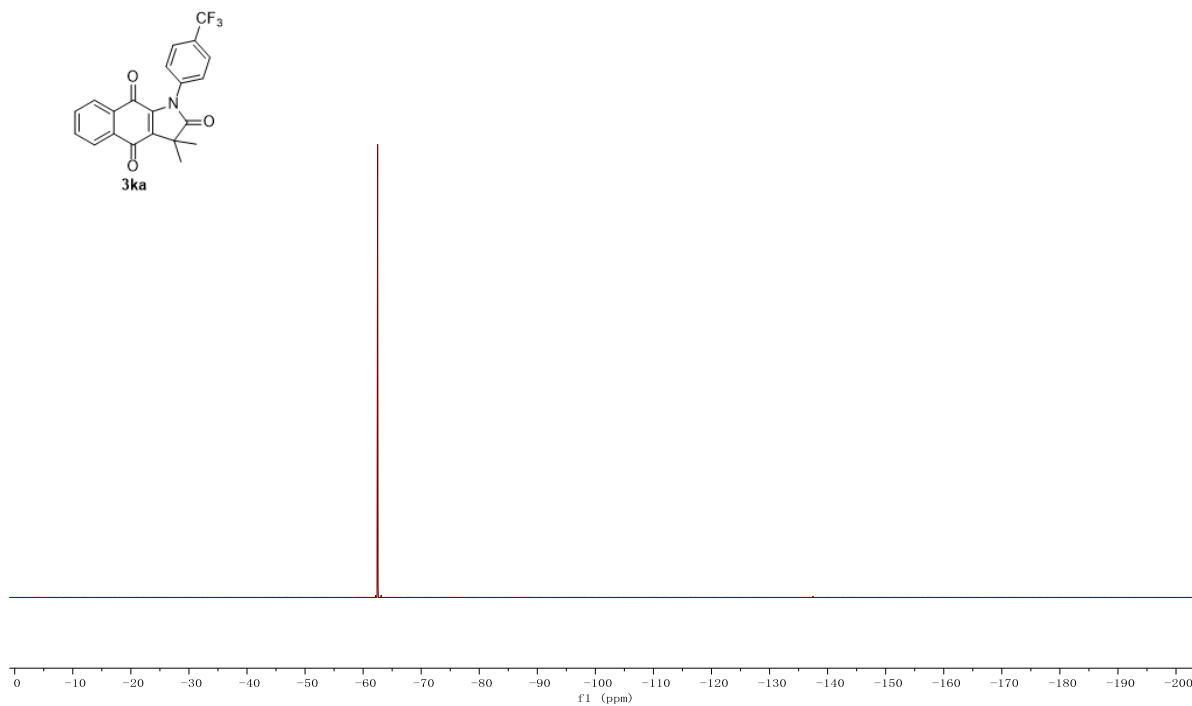

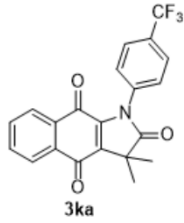

IR (KBr) spectrum for compound **3ka**

Title \*星期日 6月 21 10:34:50 2020 (GMT+08:00)

星期五 7月 24 11:14:04 20

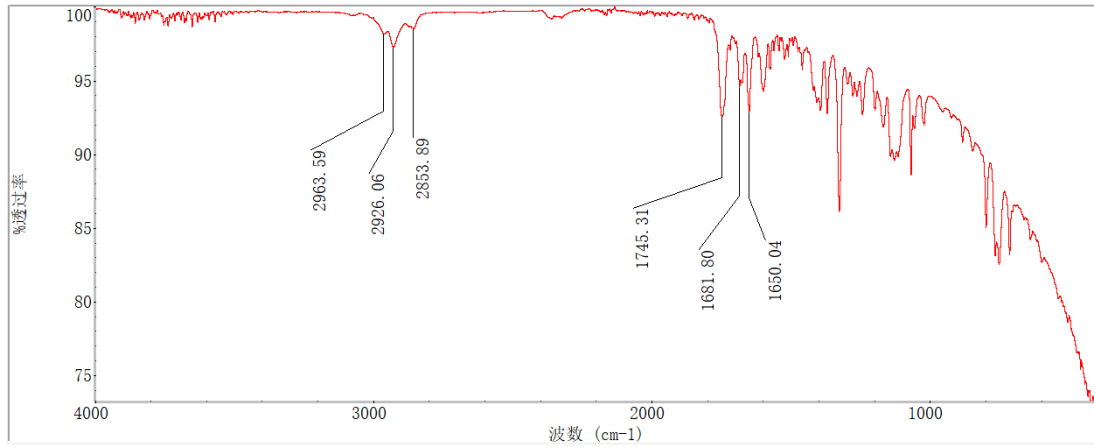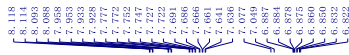

$^1\text{H}$  NMR in  $\text{CDCl}_3$  for **3la**

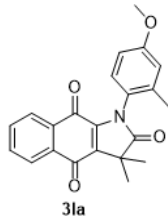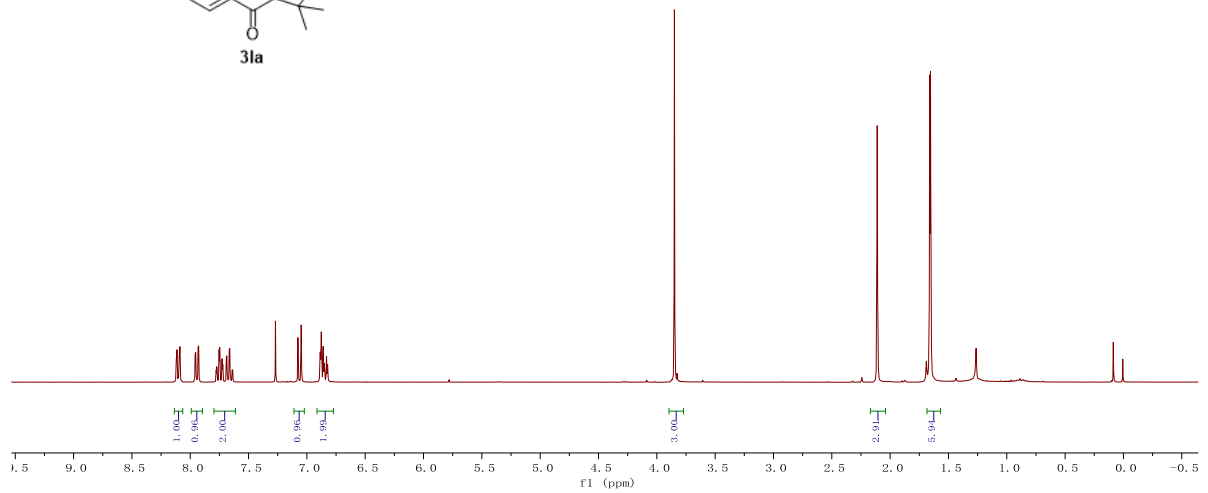

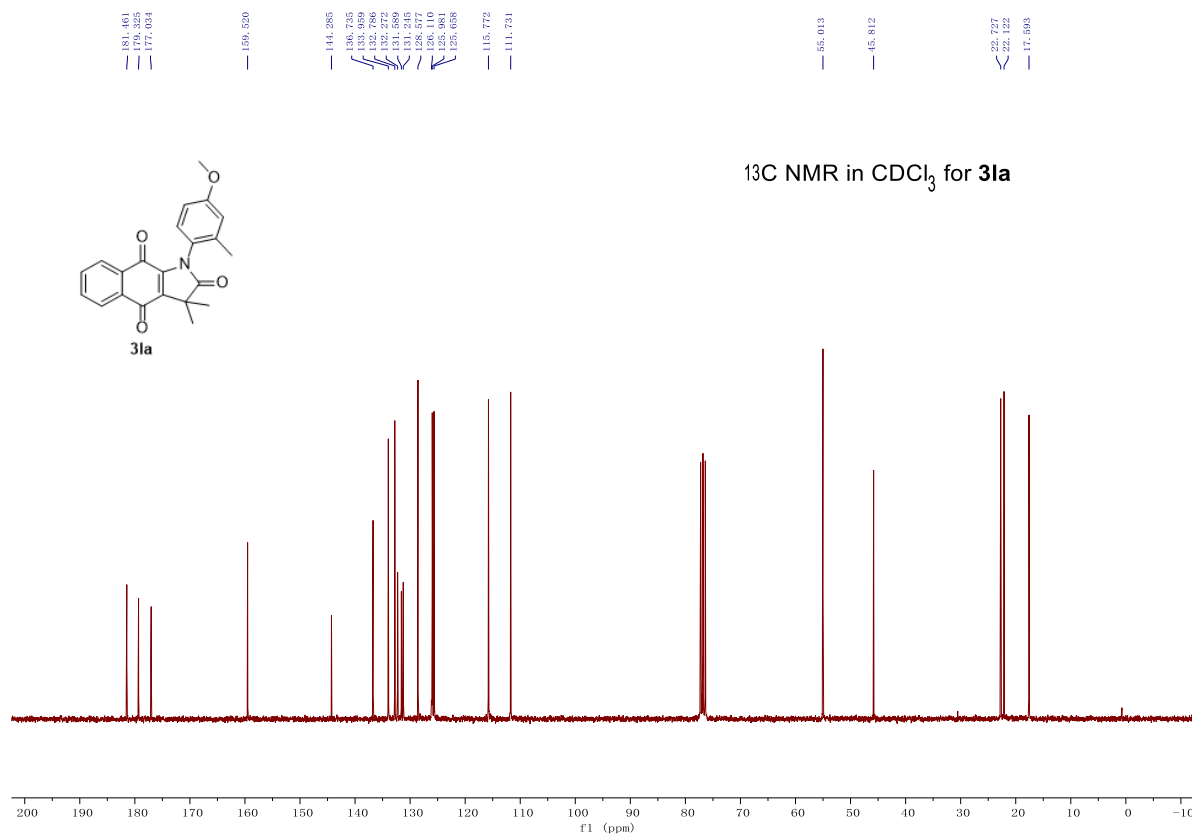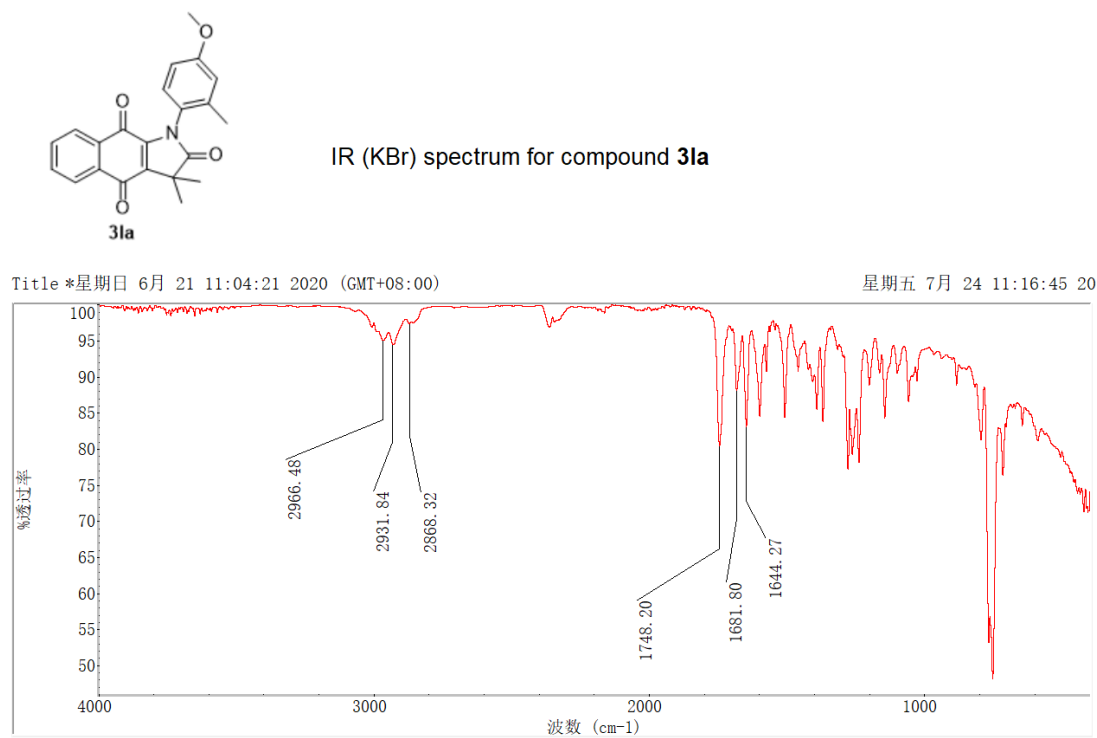

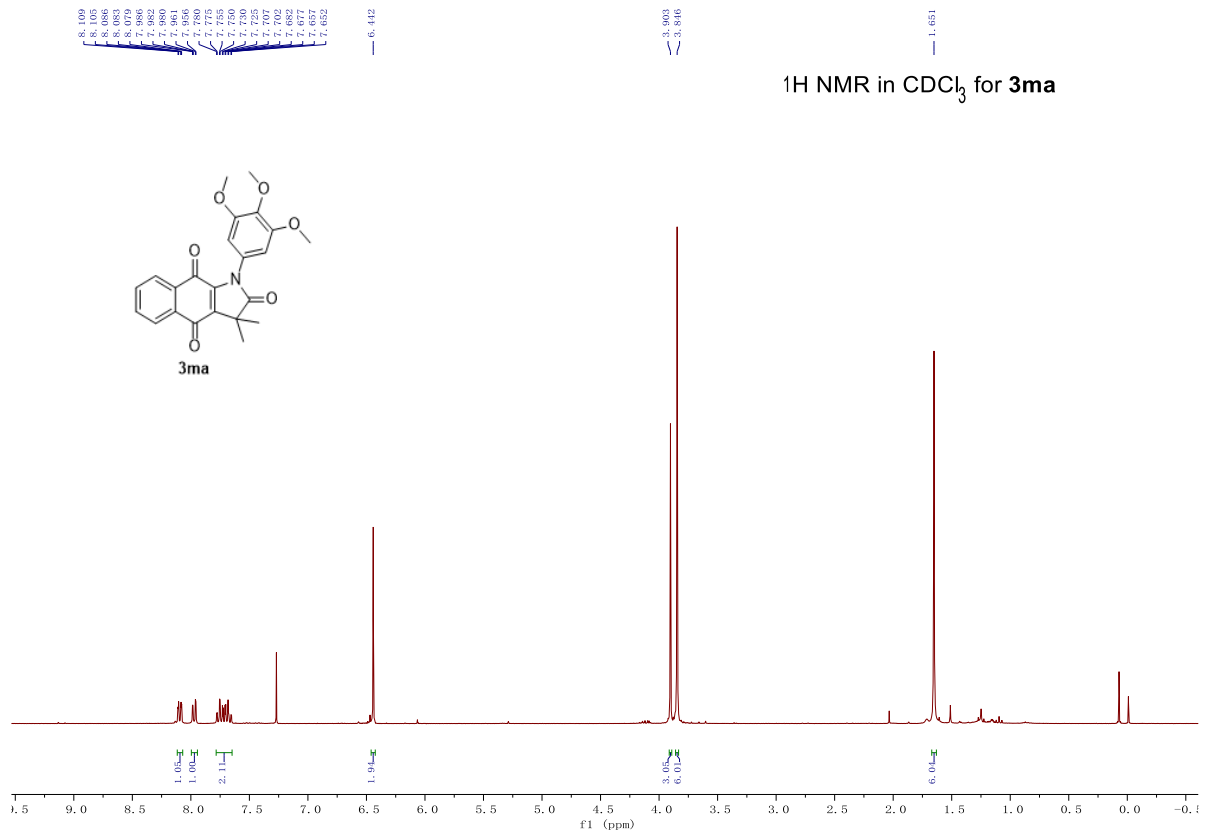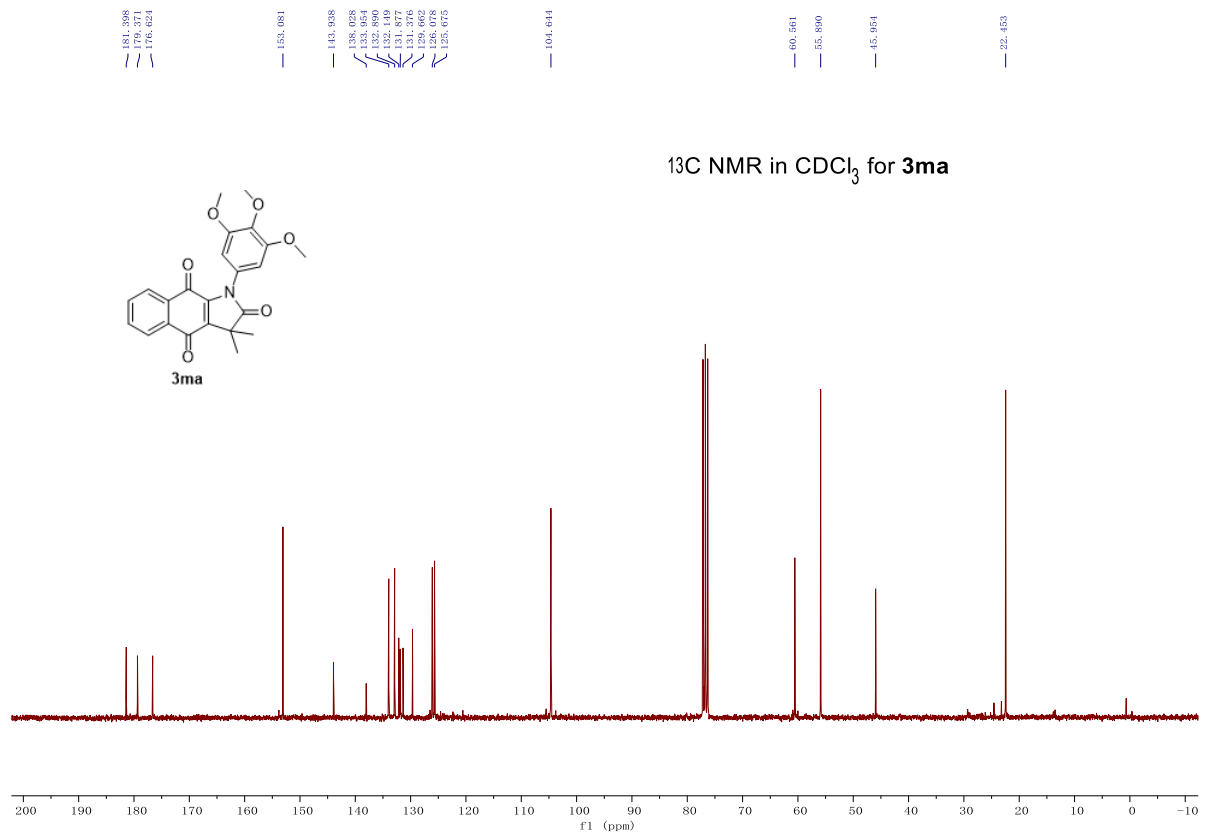



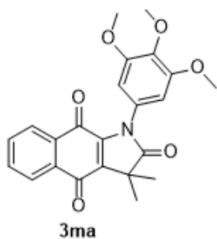

IR (KBr) spectrum for compound **3ma**

Title \*星期日 6月 21 11:11:21 2020 (GMT+08:00)

星期五 7月 24 11:21:28 20

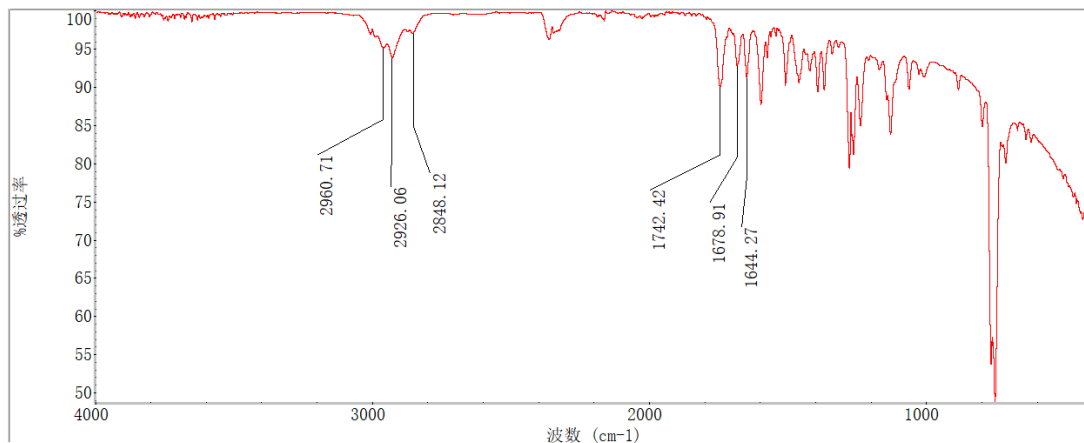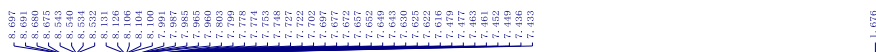

<sup>1</sup>H NMR in CDCl<sub>3</sub> for **3na**

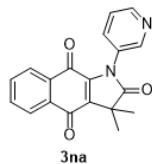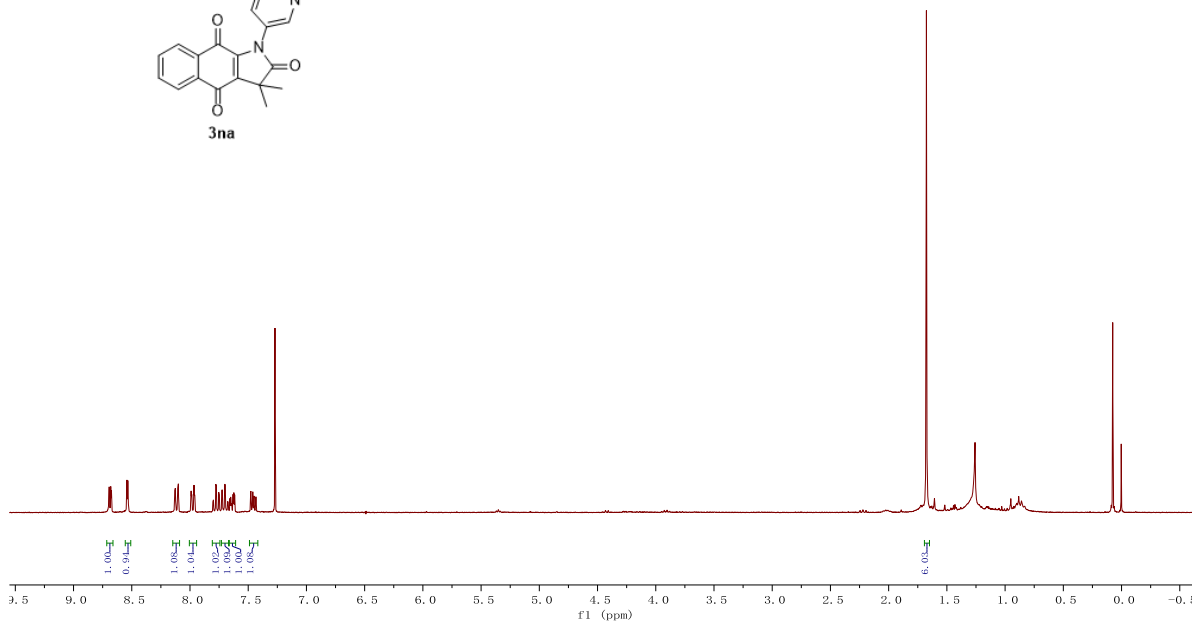

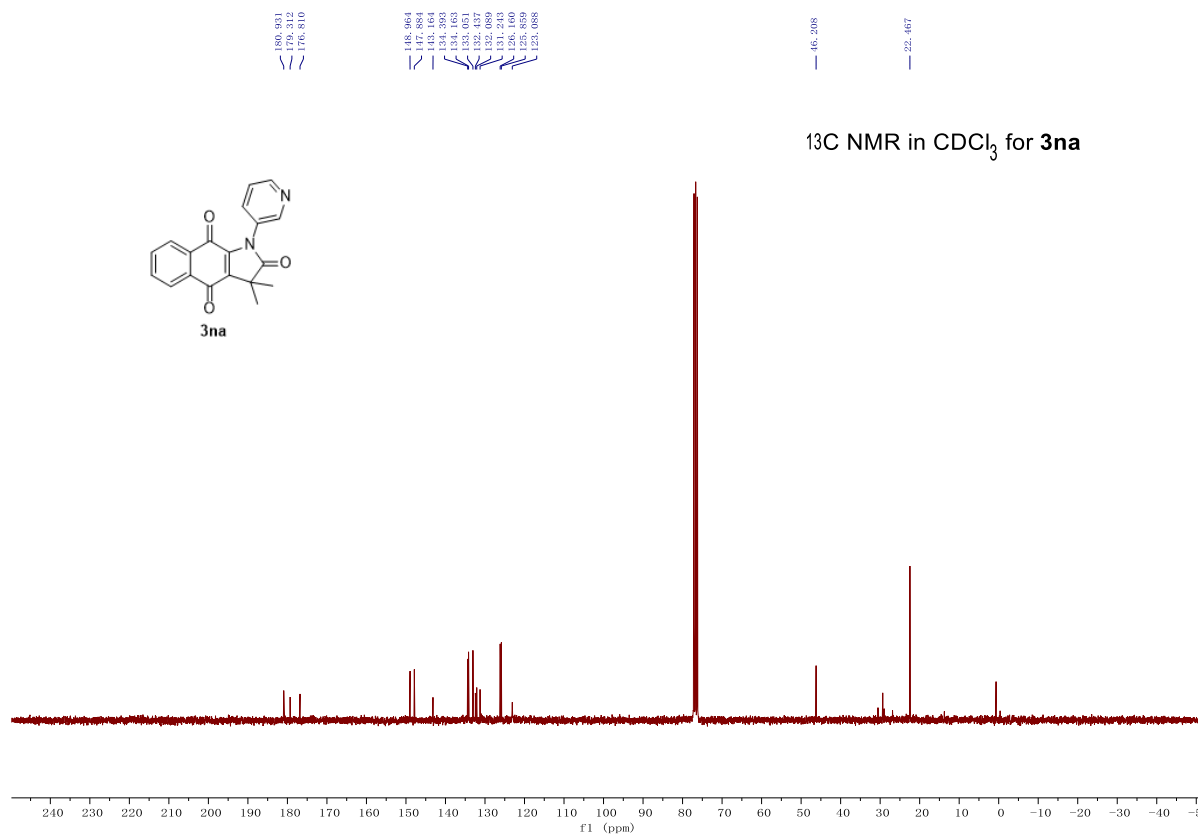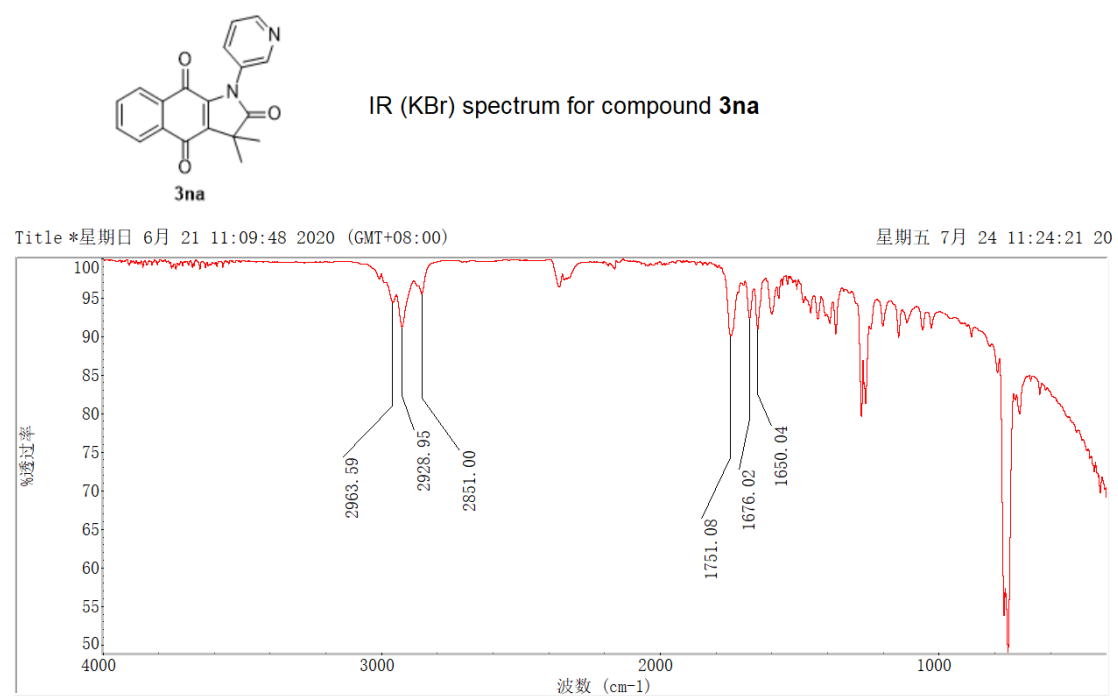

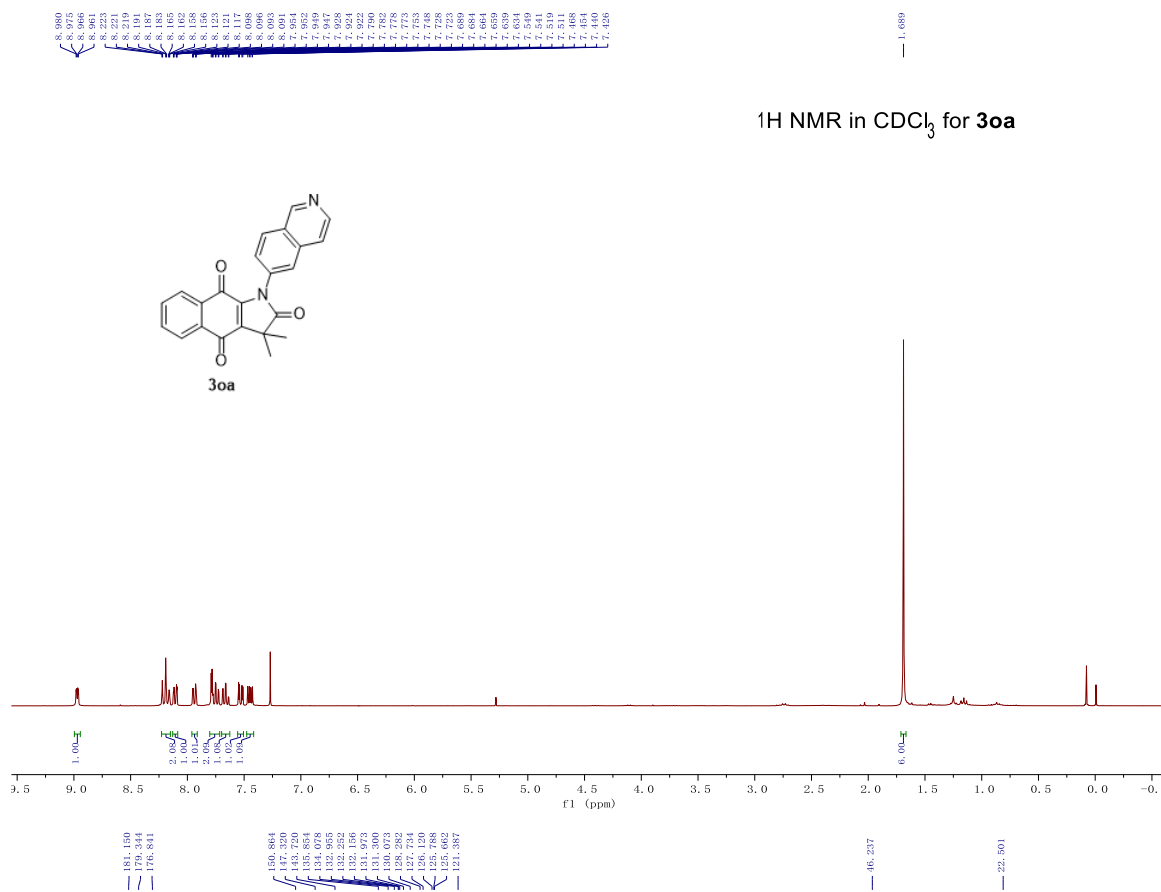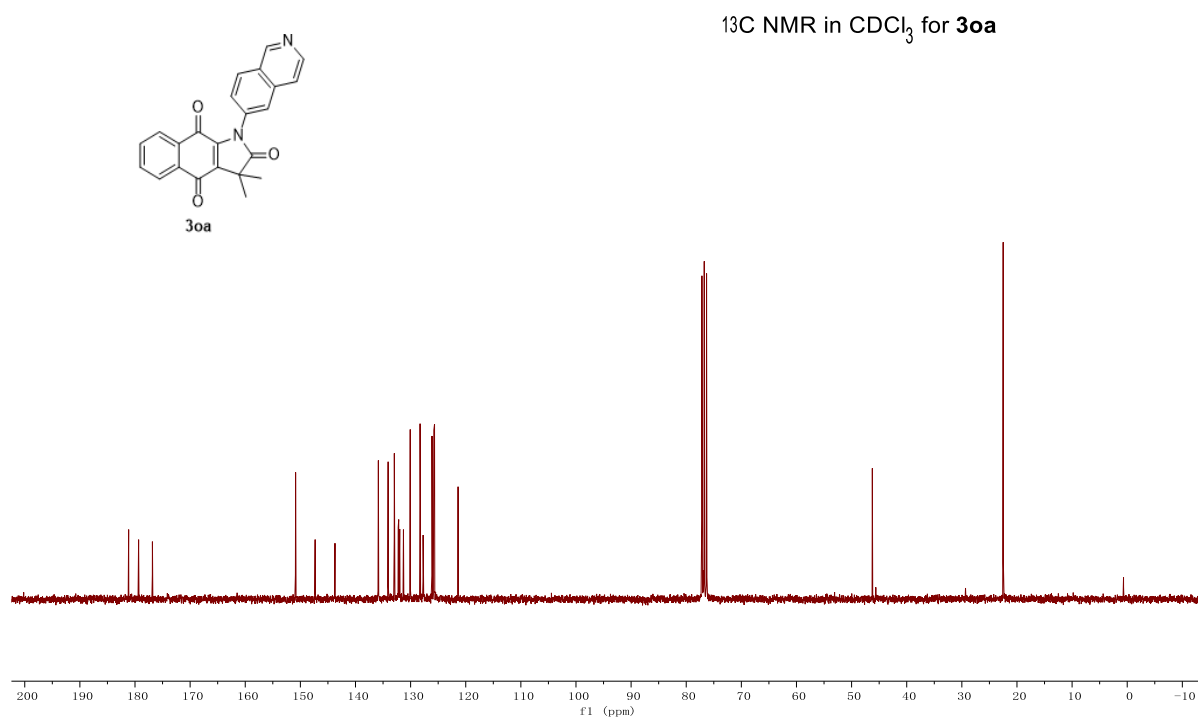

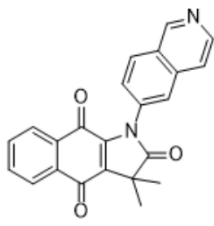

3oa

IR (KBr) spectrum for compound 3oa

Title \*星期日 6月 21 11:07:02 2020 (GMT+08:00)

星期五 7月 24 11:26:41 20

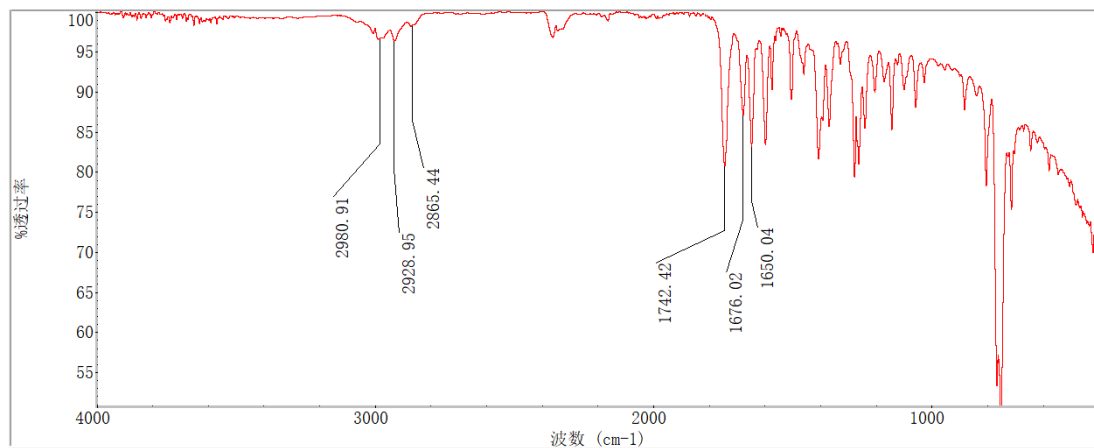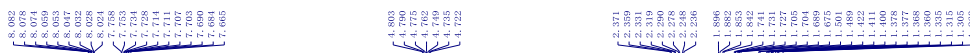

1H NMR in CDCl<sub>3</sub> for 3pa

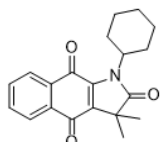

3pa

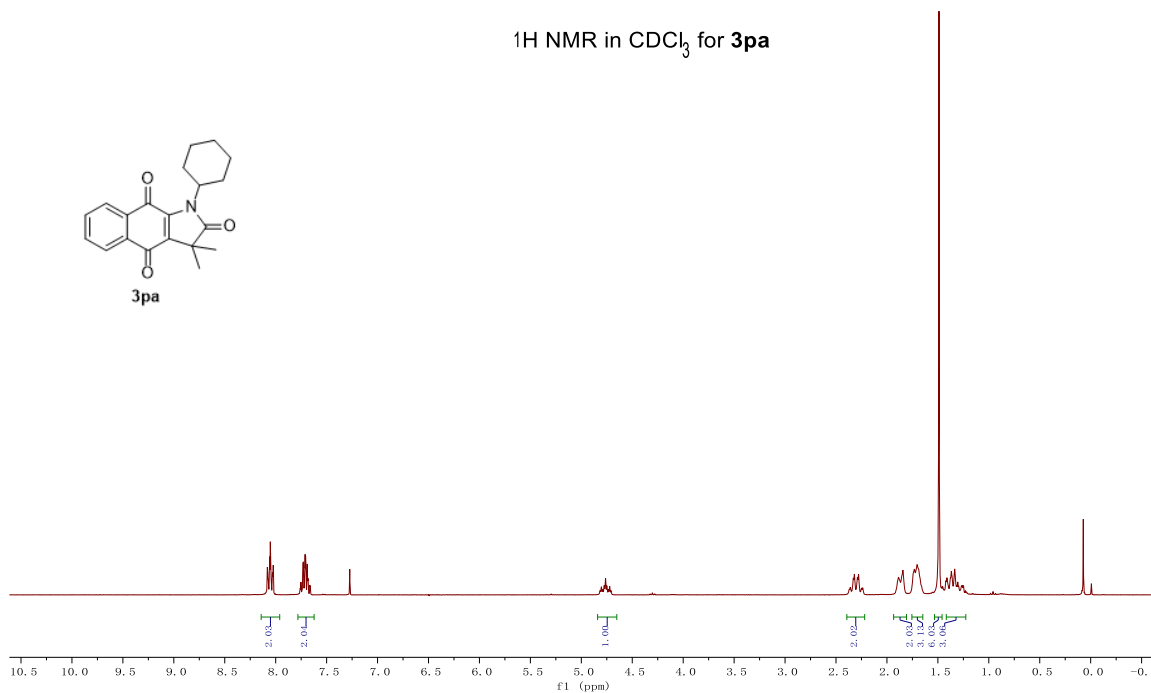

182.495  
178.978  
176.361

144.968  
138.752  
136.677  
135.920  
132.668  
131.684  
128.385  
125.384

54.261  
45.454

29.283  
28.778  
22.559

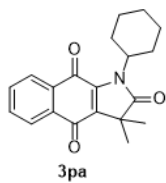

<sup>13</sup>C NMR in CDCl<sub>3</sub> for **3pa**

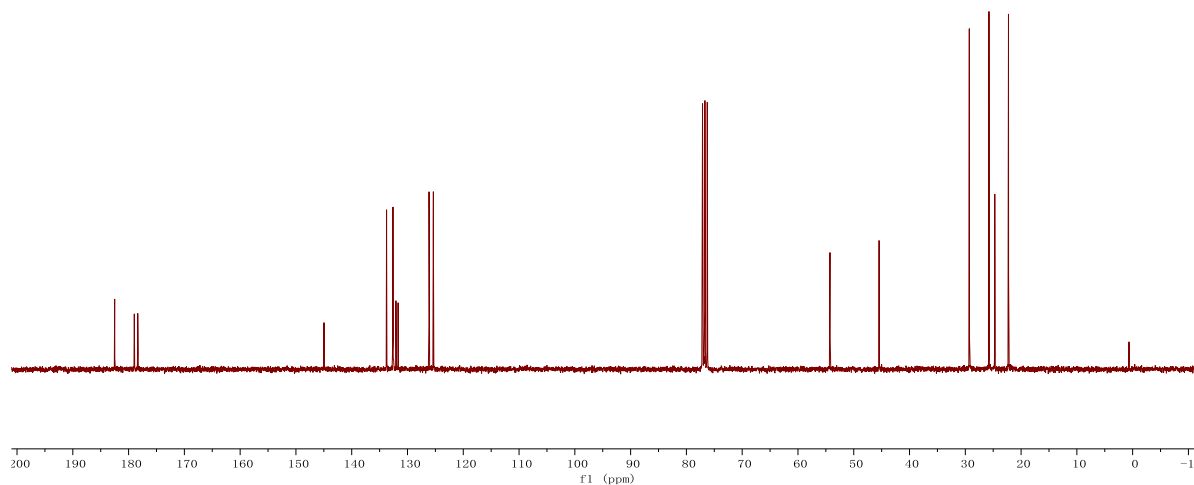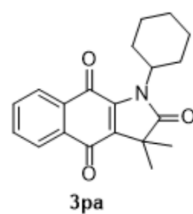

IR (KBr) spectrum for compound **3pa**

Title \*星期日 6月 21 10:54:21 2020 (GMT+08:00)

星期五 7月 24 11:30:54 20

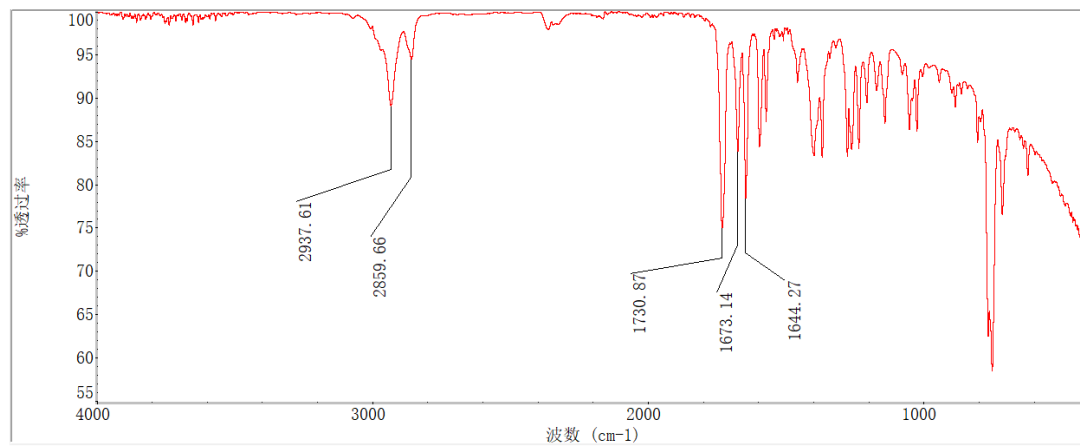

8.0473  
8.0452  
8.0455  
8.0449  
8.0441  
8.0433  
8.0255  
7.7914  
7.7396  
7.7331  
7.7242  
7.7209  
7.6999  
7.6993  
7.6988  
7.6688  
7.6483  
7.6483  
7.3952  
7.3775  
7.3765  
7.3762  
7.3588  
7.3535  
7.3535  
7.3490  
7.3333  
7.3223  
7.3118  
7.3118  
7.3111  
7.2926  
7.2926  
7.2776  
7.2563  
7.2563  
7.2558

1.1894

<sup>1</sup>H NMR in CDCl<sub>3</sub> for 3qa

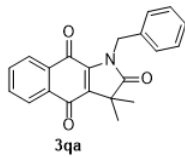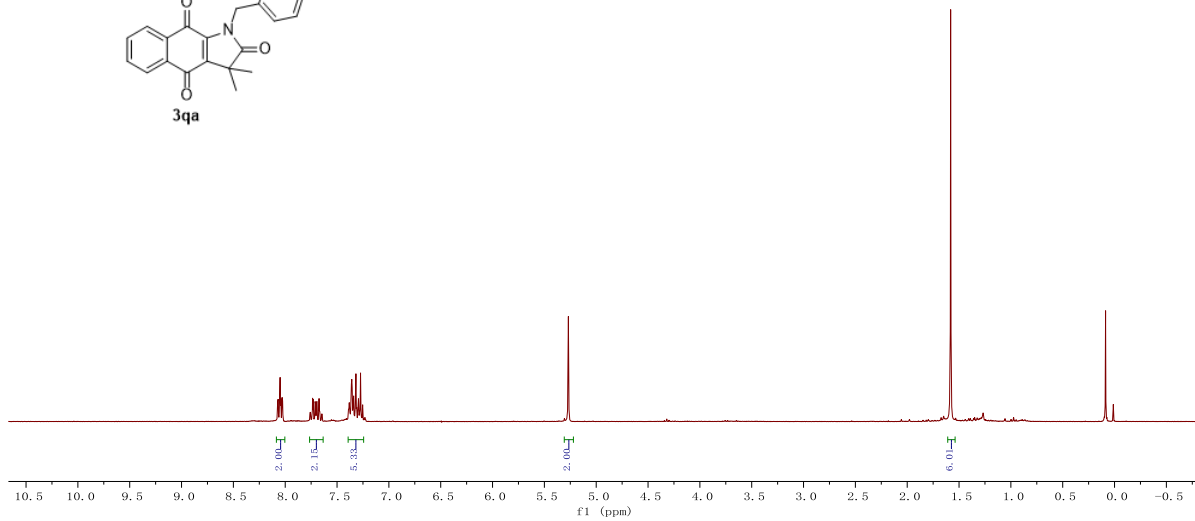

182.205  
178.982  
177.986

135.659  
135.999  
132.931  
132.597  
132.577  
131.757  
131.214  
128.289  
127.299  
126.005  
125.552

45.762  
44.192

22.214

<sup>13</sup>C NMR in CDCl<sub>3</sub> for 3qa

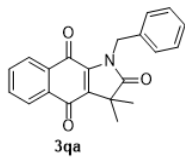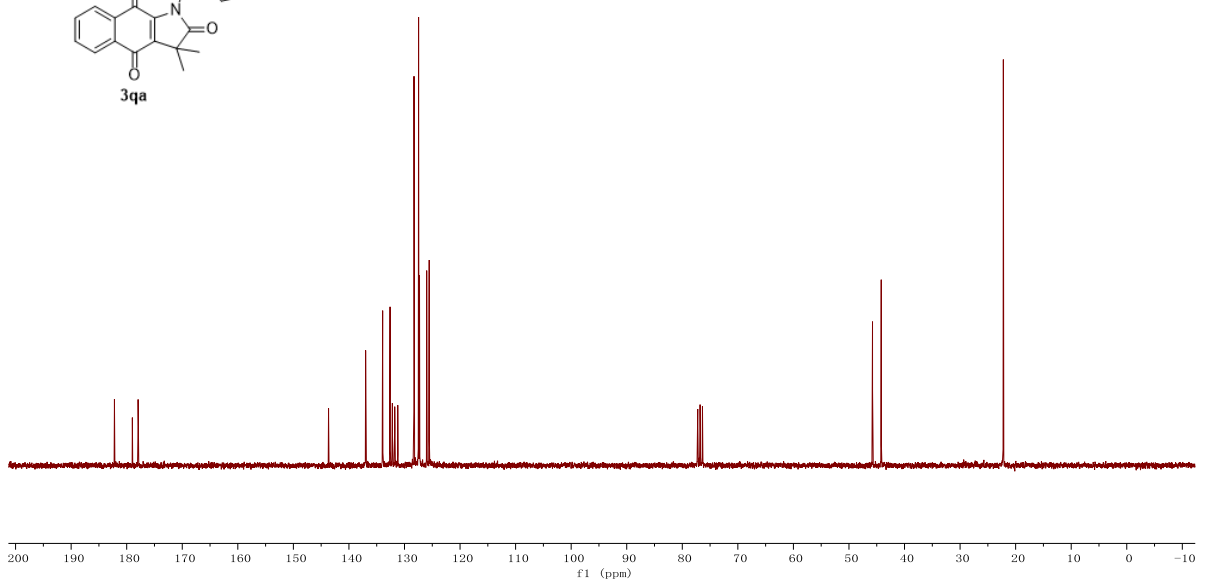



182.215  
179.130  
177.702

144.140  
140.408  
133.789  
132.675  
132.015  
131.452  
128.908  
128.882  
128.206  
128.216  
125.413

51.346  
45.016

22.401  
22.176  
17.332

$^{13}\text{C}$  NMR in  $\text{CDCl}_3$  for **3ra**

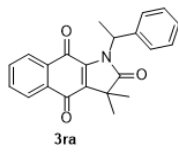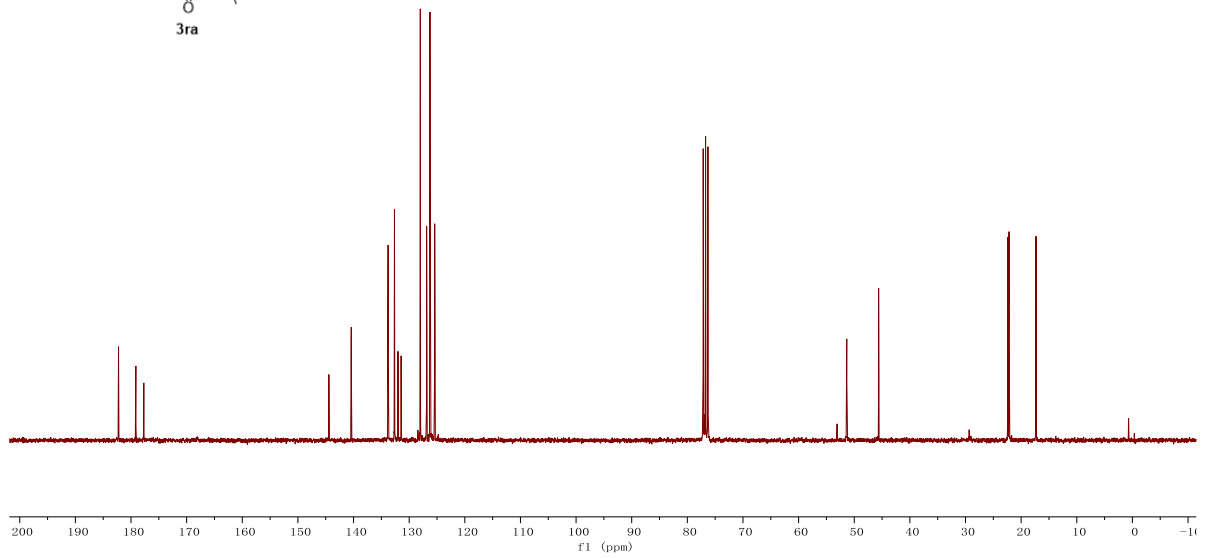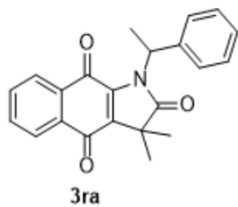

IR (KBr) spectrum for compound **3ra**

Title \*星期日 6月 21 10:56:48 2020 (GMT+08:00)

星期五 7月 24 11:35:49 20

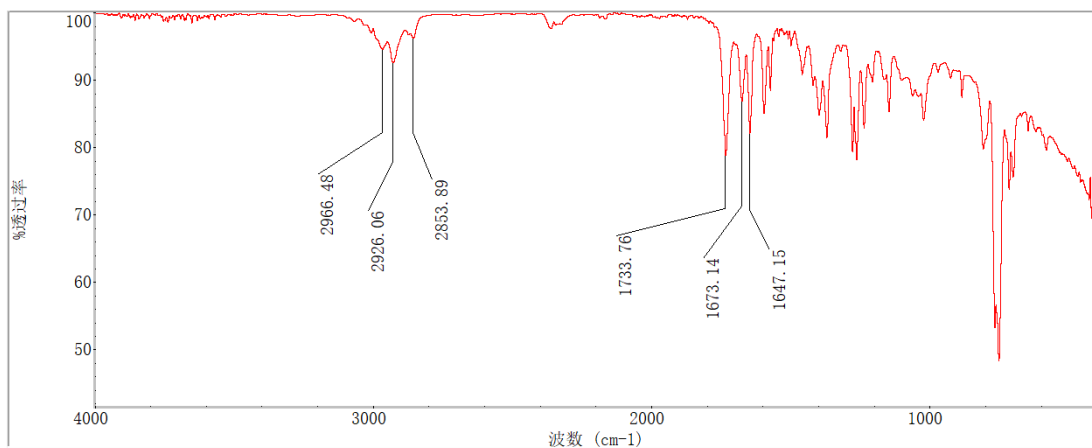



8.086  
8.084  
8.081  
8.078  
8.073  
8.071  
8.067  
8.056  
8.054  
8.049  
8.043  
8.041  
7.781  
7.744  
7.739  
7.736  
7.714  
7.709  
7.685  
7.685  
7.685  
7.680

4.053  
4.035  
4.029  
4.029  
4.014  
4.011  
4.001  
4.000  
1.627  
1.627  
1.611  
1.602  
1.590  
1.589  
1.580  
1.574  
1.573  
1.499  
1.403  
1.388  
1.379  
1.374  
1.374  
1.353  
1.328  
1.328  
1.324  
1.324  
0.974  
0.950  
0.925

<sup>1</sup>H NMR in CDCl<sub>3</sub> for **3sa**

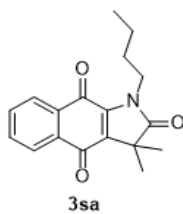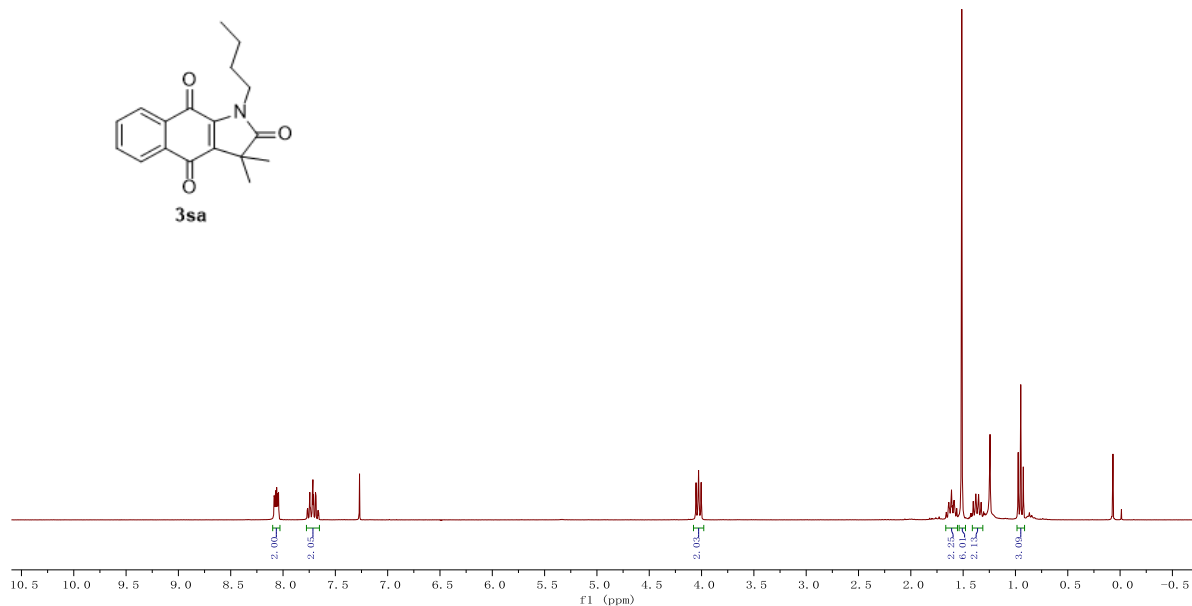

185.853  
185.883  
178.222

144.196  
133.917  
132.514  
132.497  
131.299  
125.930  
125.533

45.588  
40.921  
31.261  
22.191  
19.541  
13.307

<sup>13</sup>C NMR in CDCl<sub>3</sub> for **3sa**

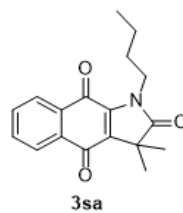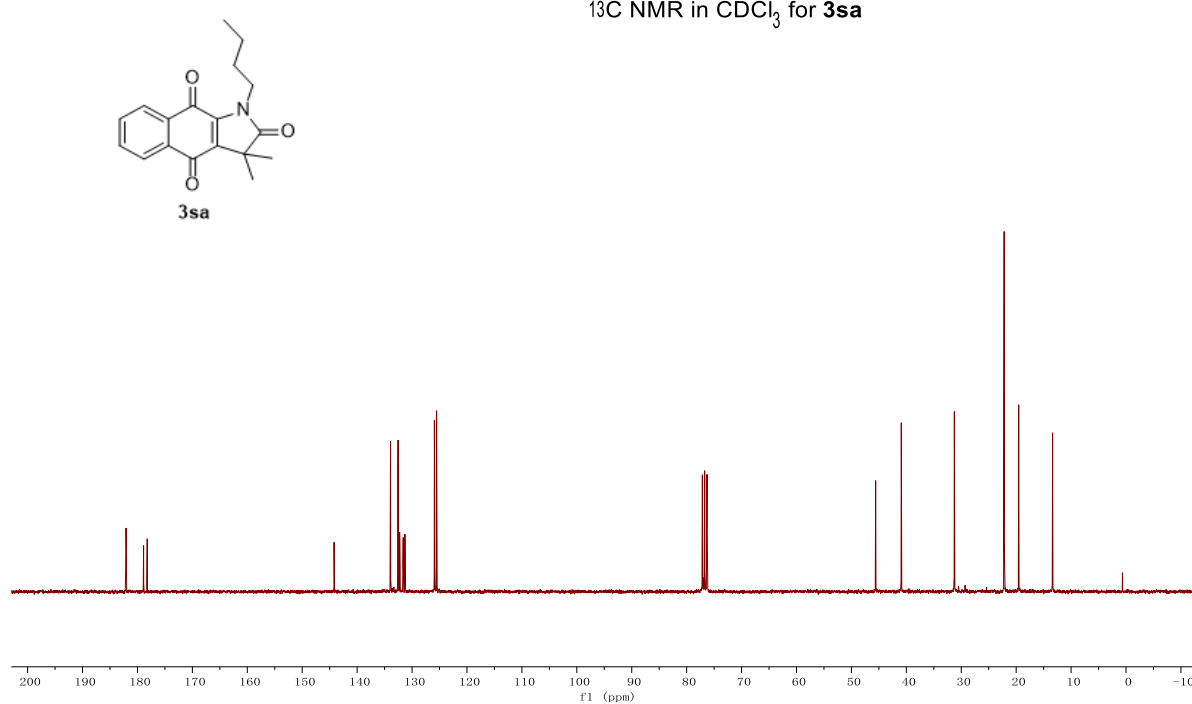

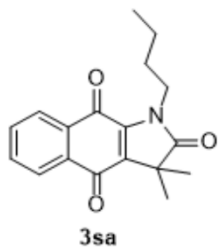

IR (KBr) spectrum for compound **3sa**

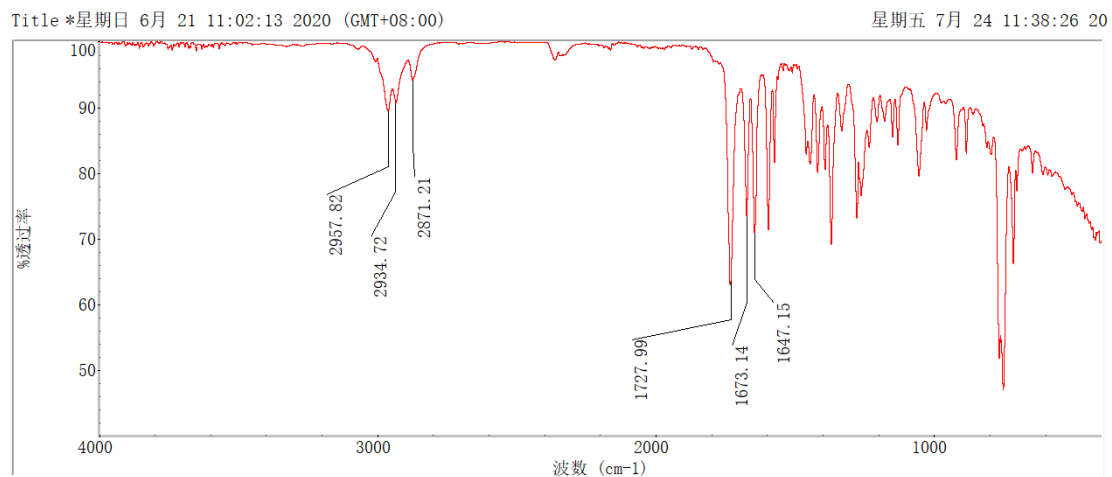

8.086  
8.089  
8.083  
8.072  
8.066  
8.058  
8.054  
7.732  
7.728  
7.722  
7.698  
7.693

4.049  
4.020  
4.020  
4.000

1.649  
1.632  
1.625  
1.576  
1.521  
1.326  
1.319  
1.310  
0.903  
0.897  
0.884  
0.856

<sup>1</sup>H NMR in CDCl<sub>3</sub> for **3ta**

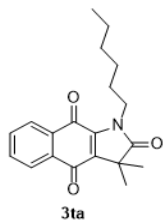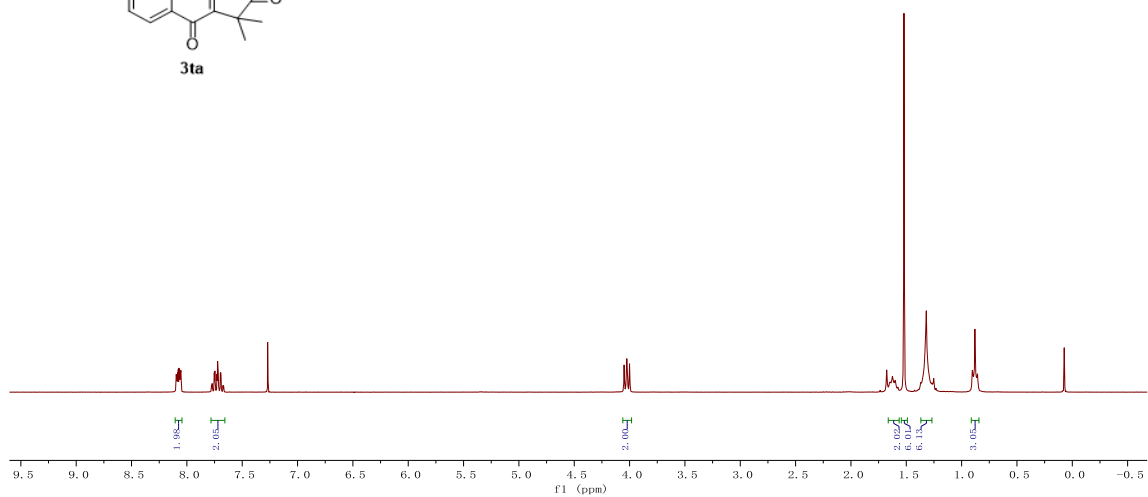

188.085  
178.210

144.223

138.922  
138.291  
133.639  
131.350  
126.555

45.007  
41.166

31.023  
29.136  
25.948  
22.204  
22.165

13.591

$^{13}\text{C}$  NMR in  $\text{CDCl}_3$  for **3ta**

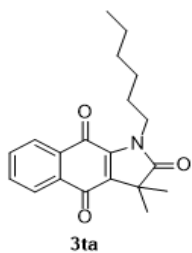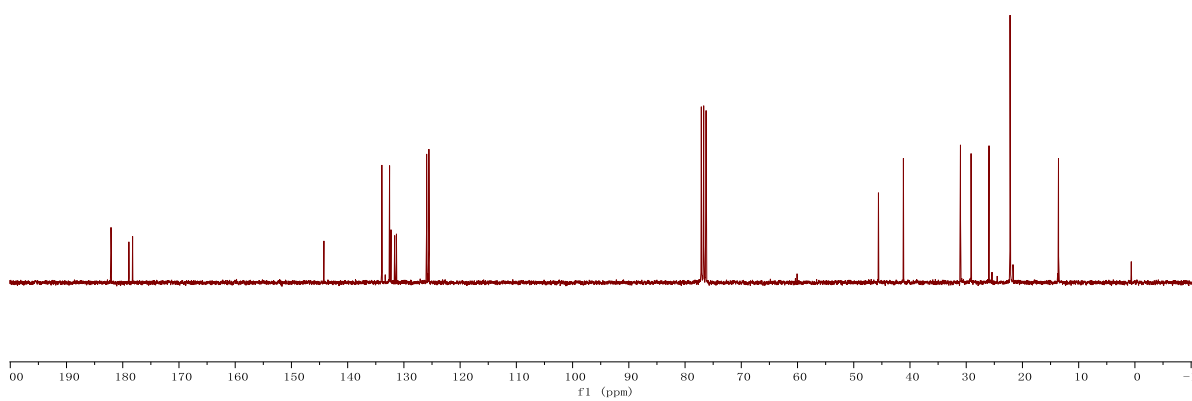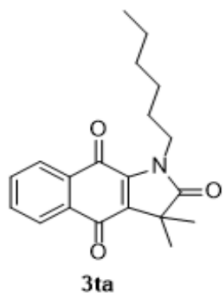

IR (KBr) spectrum for compound **3ta**

Title \*星期日 6月 21 10:37:07 2020 (GMT+08:00)

星期五 7月 24 12:43:48 20

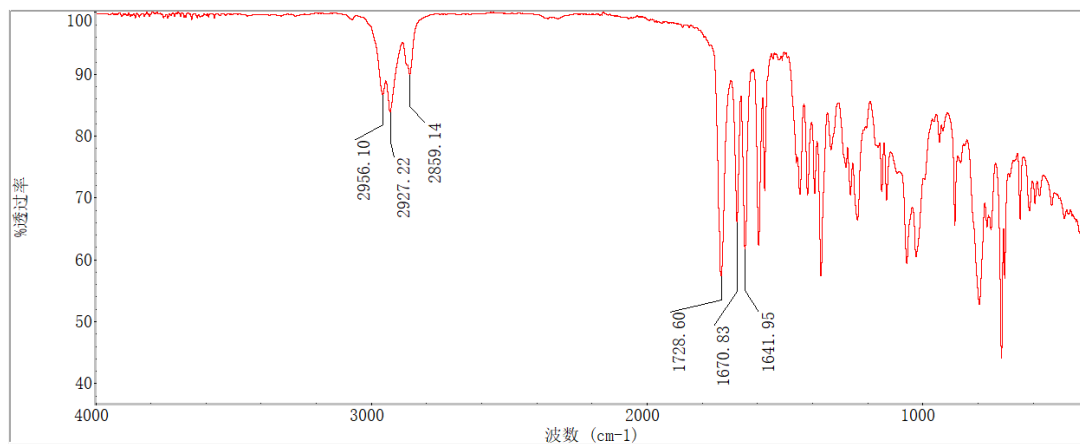

8.1109  
8.083  
8.079  
8.056  
7.950  
7.930  
7.925  
7.765  
7.745  
7.730  
7.715  
7.682  
7.657  
7.652  
7.632  
7.575  
7.540  
7.533  
7.520  
7.520  
7.510  
7.510  
7.500  
7.491  
7.480  
7.480  
7.481  
7.475  
7.465  
7.462  
7.458  
7.272  
7.262  
7.261  
7.253  
7.246  
7.240  
7.240  
7.235

2.470  
2.465  
2.434  
2.434  
2.390  
2.376  
2.290  
2.282  
2.182  
2.162  
2.150  
2.148  
2.118  
2.106  
2.056  
2.025  
2.063  
2.050  
1.828  
1.817  
1.805  
2.362  
1.719  
1.708  
1.686  
1.675  
1.662  
1.650  
1.518  
1.500  
1.475  
1.463  
1.420

<sup>1</sup>H NMR in CDCl<sub>3</sub> for **3ab**

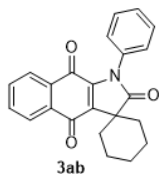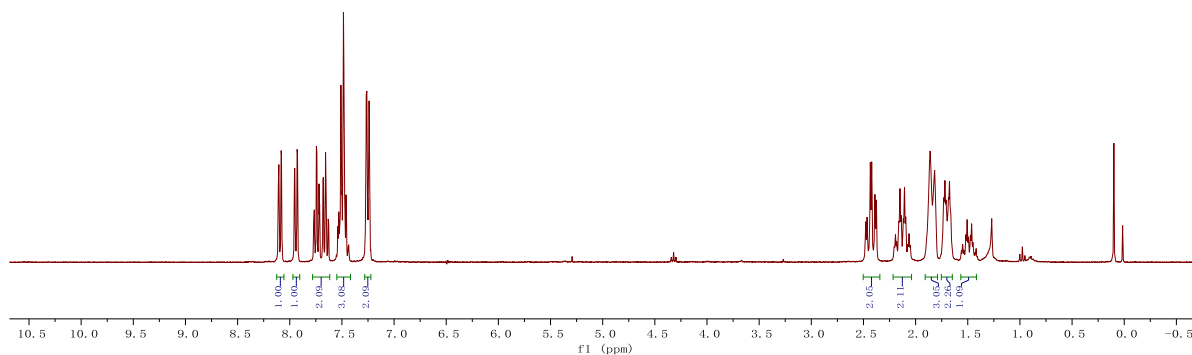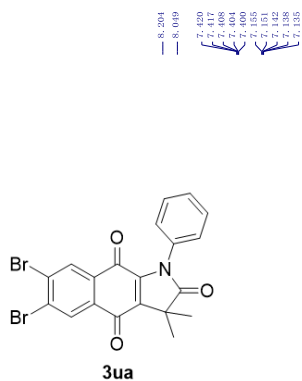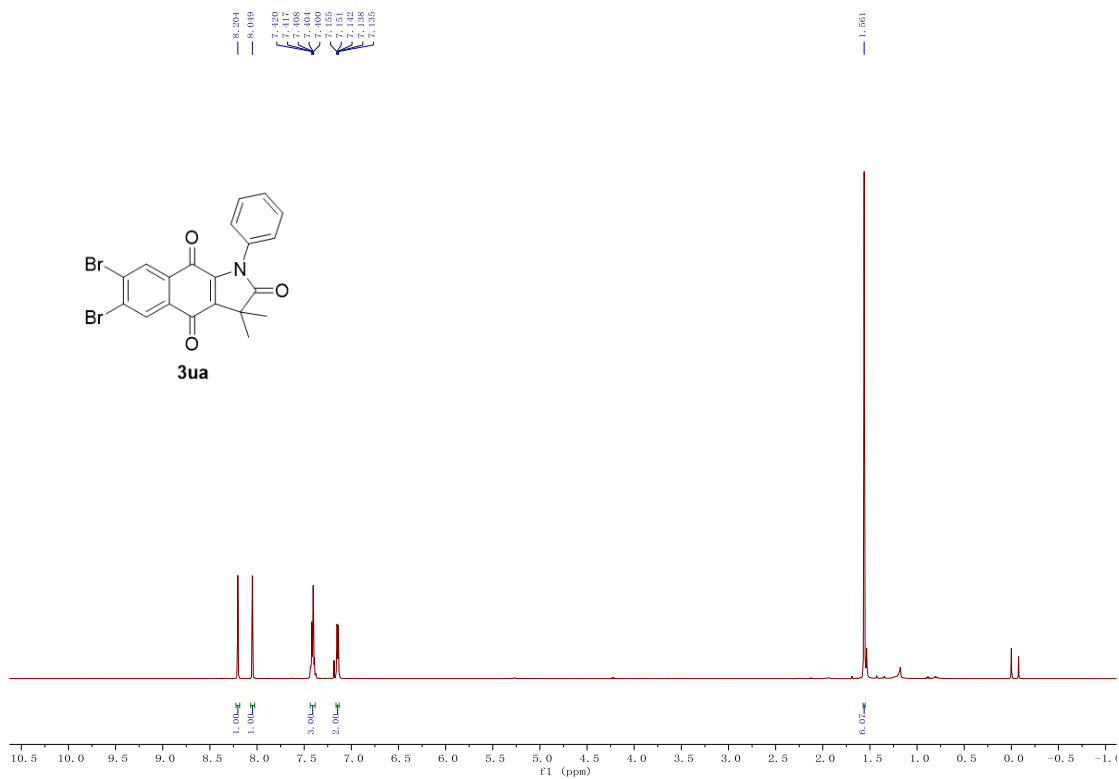

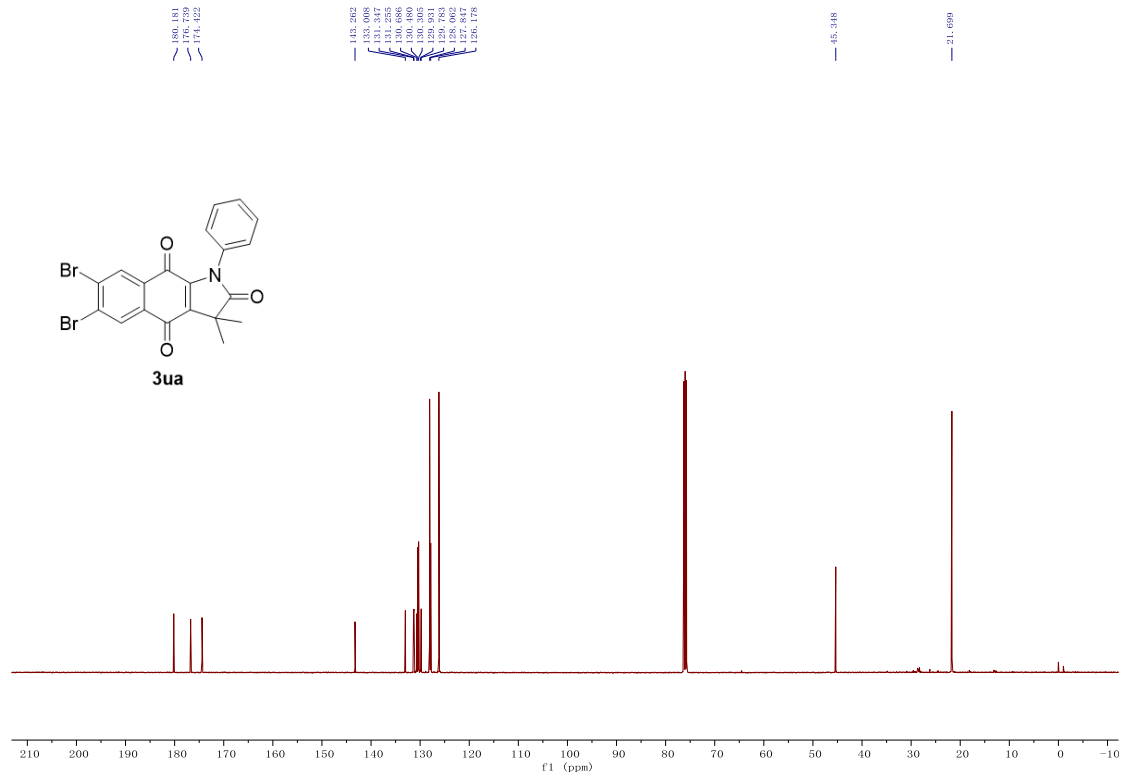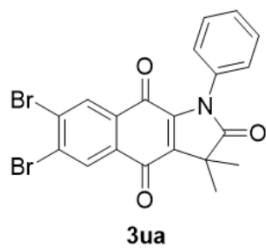

IR (KBr) spectrum for compound **3ua**

Title \*星期四 7月 16 19:40:00 2020 (GMT+08:00)

星期五 7月 24 11:44:36 20

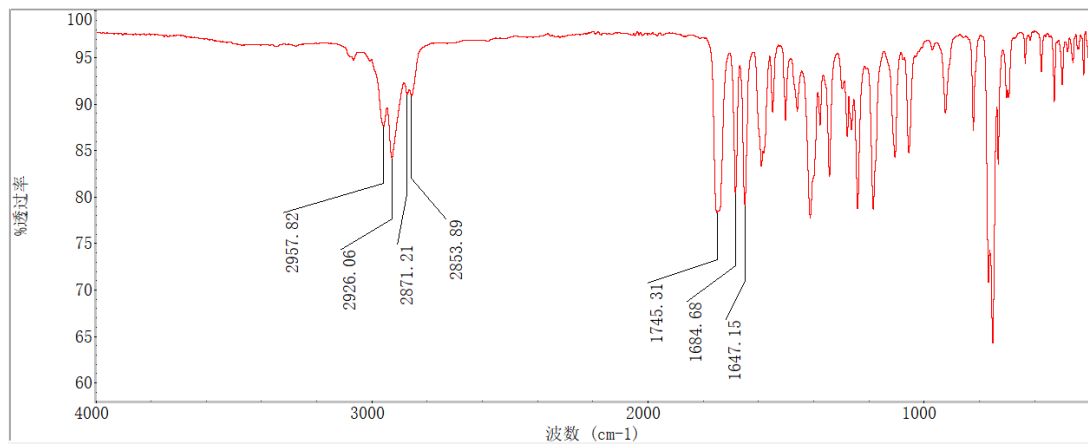

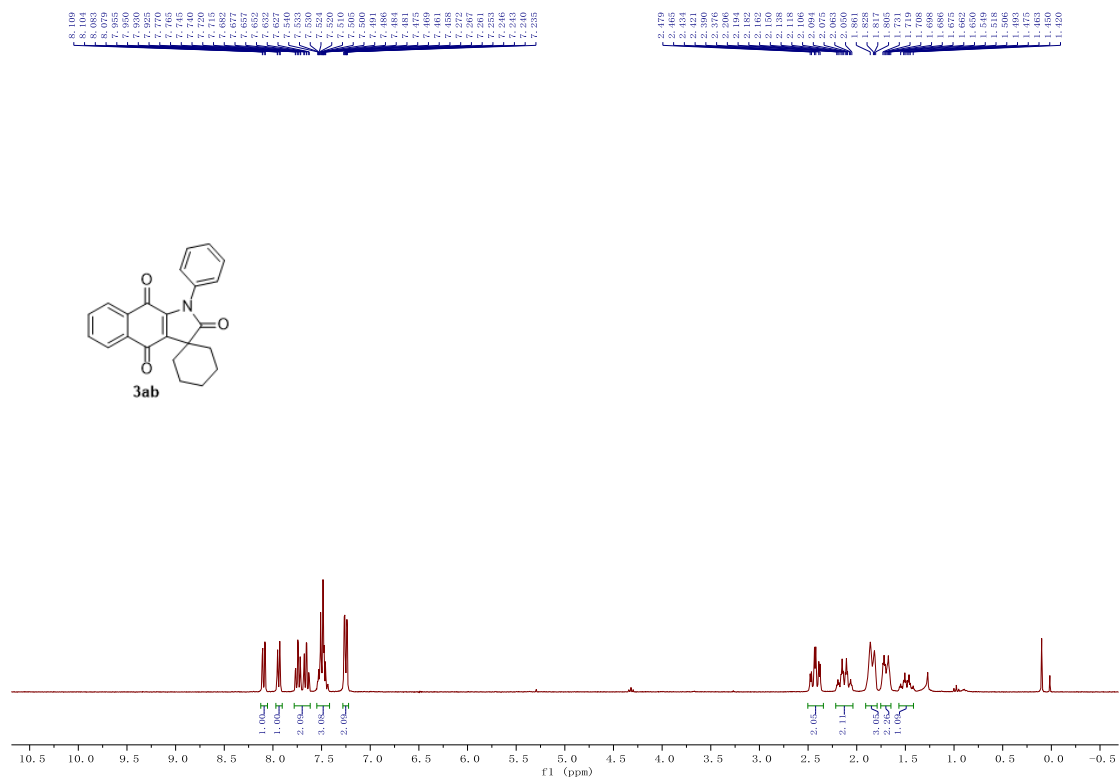

179.866  
179.289  
176.527

144.296  
134.229  
133.909  
133.588  
132.880  
131.405  
130.884  
129.884  
128.191  
127.063  
125.933  
125.178

49.075

30.158

24.492

19.527

**<sup>13</sup>C NMR in CDCl<sub>3</sub> for 3ab**

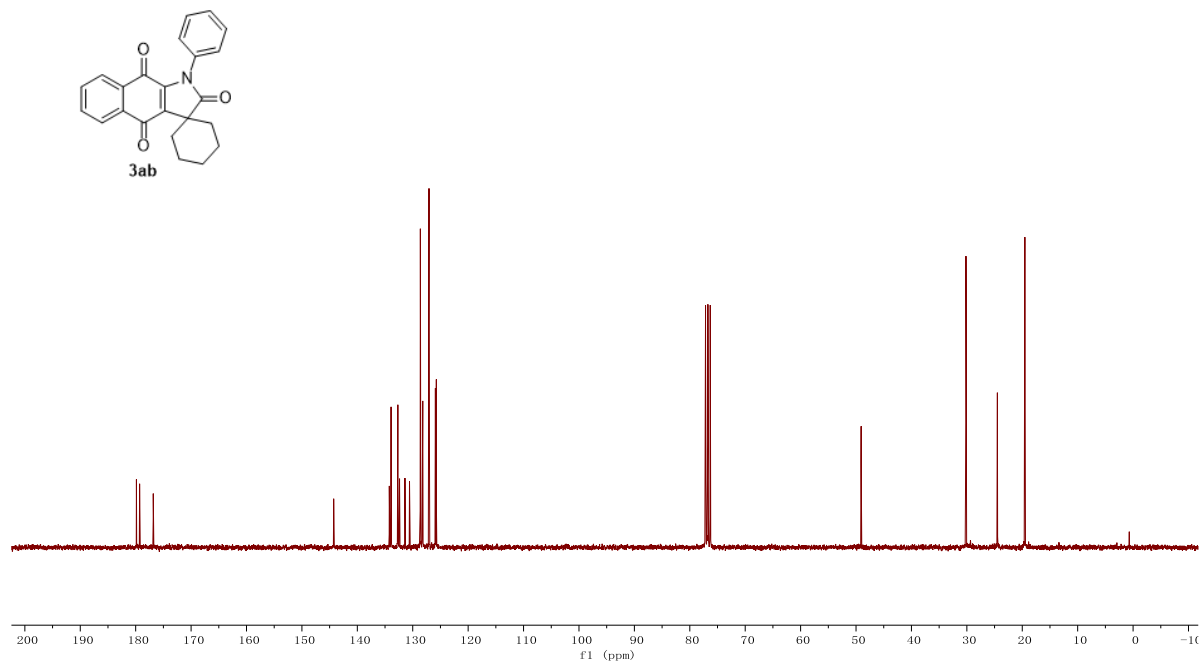

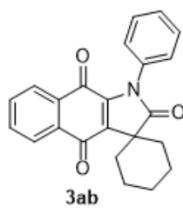

IR (KBr) spectrum for compound **3ab**

Title \*星期日 6月 21 10:47:53 2020 (GMT+08:00)

星期五 7月 24 11:50:28 20

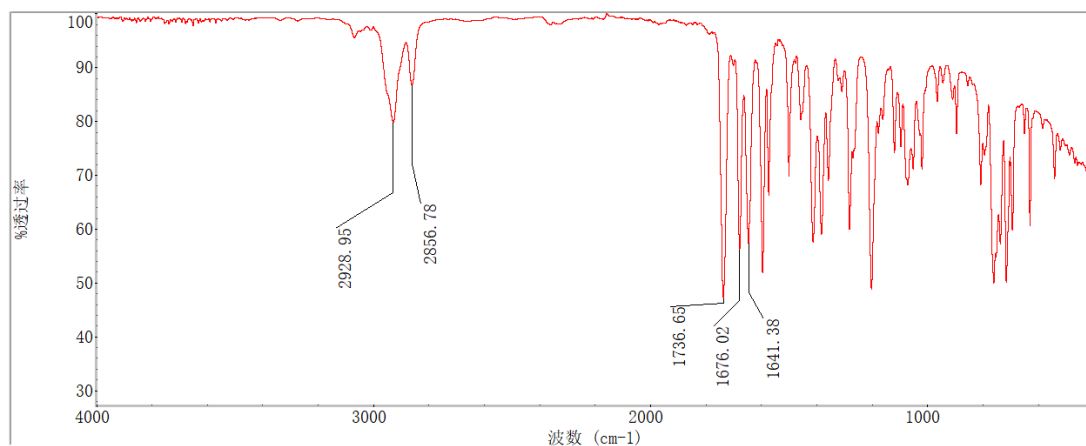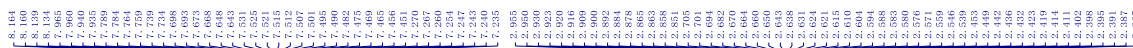

<sup>1</sup>H NMR in CDCl<sub>3</sub> for **3ac**

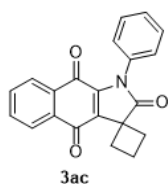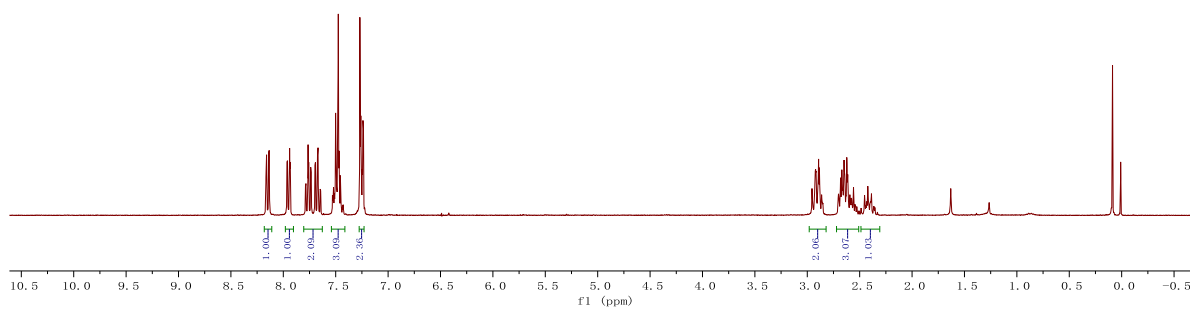

180.658  
179.619  
176.552

145.948  
134.179  
133.842  
132.845  
132.247  
131.988  
128.604  
128.205  
127.605  
126.054  
125.712

48.657

29.166

15.699

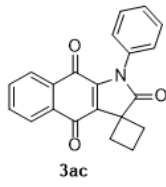

$^{13}\text{C}$  NMR in  $\text{CDCl}_3$  for **3ac**

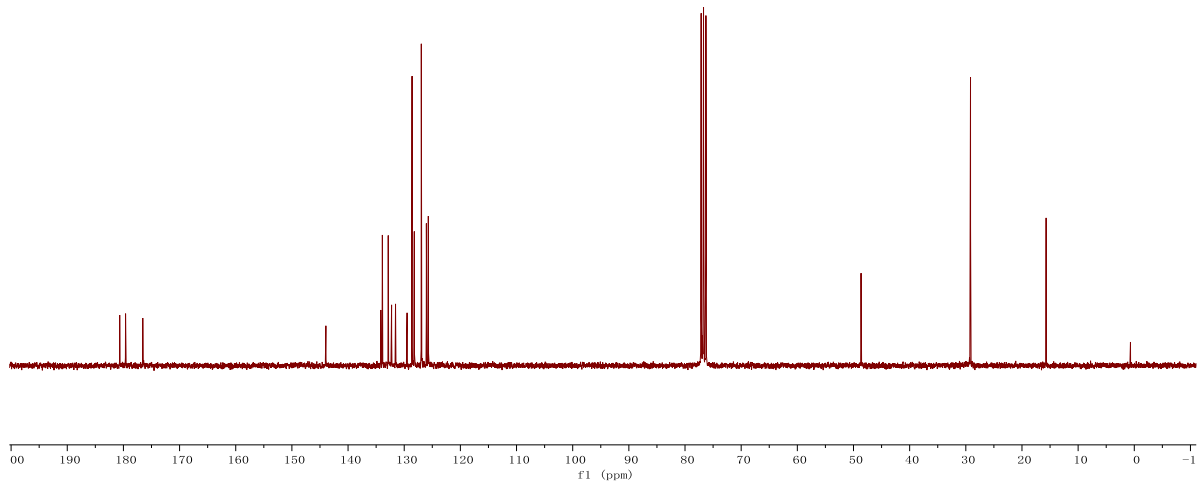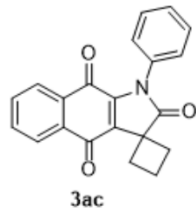

IR (KBr) spectrum for compound **3ac**

Title \*星期日 6月 21 10:50:04 2020 (GMT+08:00)

星期五 7月 24 11:53:37 20

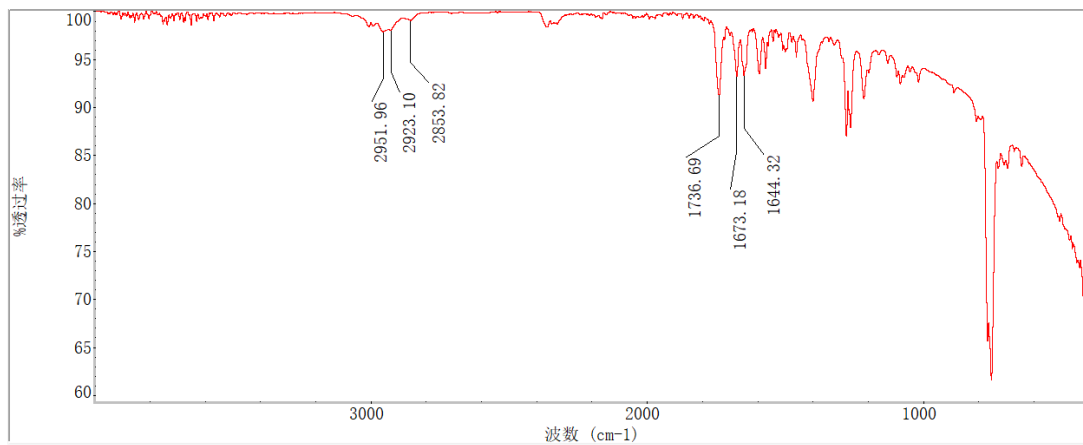



8.130  
8.127  
8.105  
8.100  
7.995  
7.970  
7.965  
7.753  
7.733  
7.728  
7.700  
7.680  
7.675  
7.594  
7.487  
7.482  
7.238  
7.232  
7.220  
7.215  
7.213  
7.207

2.328  
2.323  
2.328  
2.328  
2.284  
2.259  
2.119  
2.074  
2.069  
2.050  
2.045  
2.025  
2.000

0.873  
0.848  
0.824

<sup>1</sup>H NMR in CDCl<sub>3</sub> for **3ad**

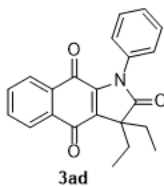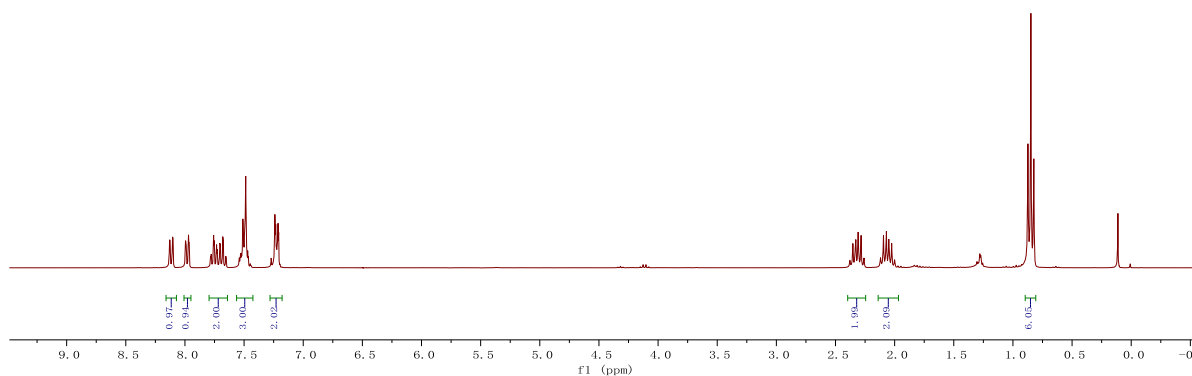

180.316  
176.323

146.394

134.302  
133.919  
132.688  
131.557  
128.746  
126.916  
126.096  
125.813

57.146

29.615

8.984

<sup>13</sup>C NMR in CDCl<sub>3</sub> for **3ad**

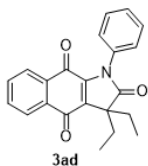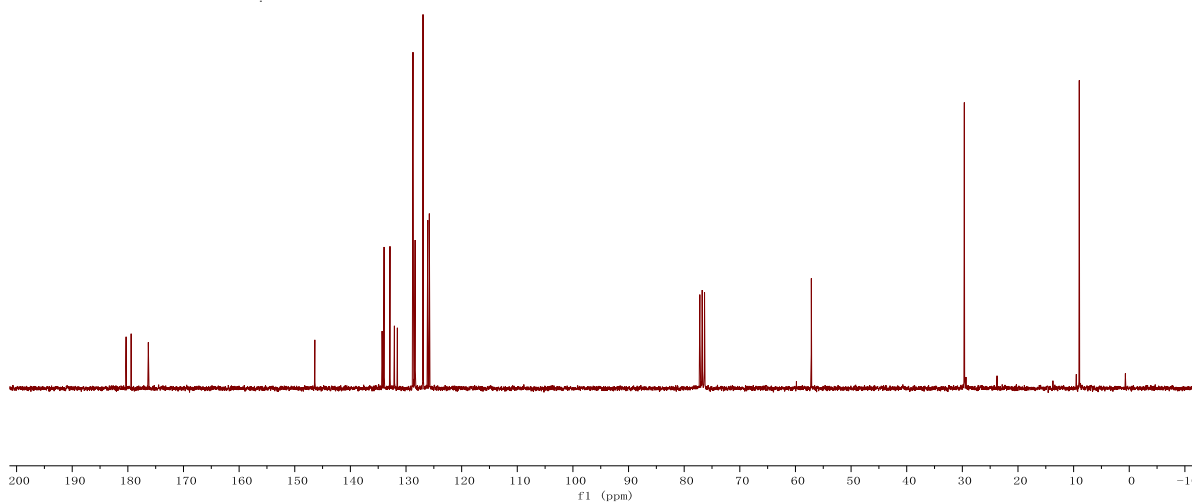

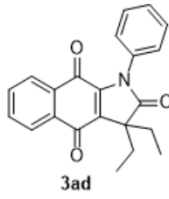

IR (KBr) spectrum for compound **3ad**

Title \*星期日 6月 21 10:45:35 2020 (GMT+08:00)

星期五 7月 24 11:56:07 20

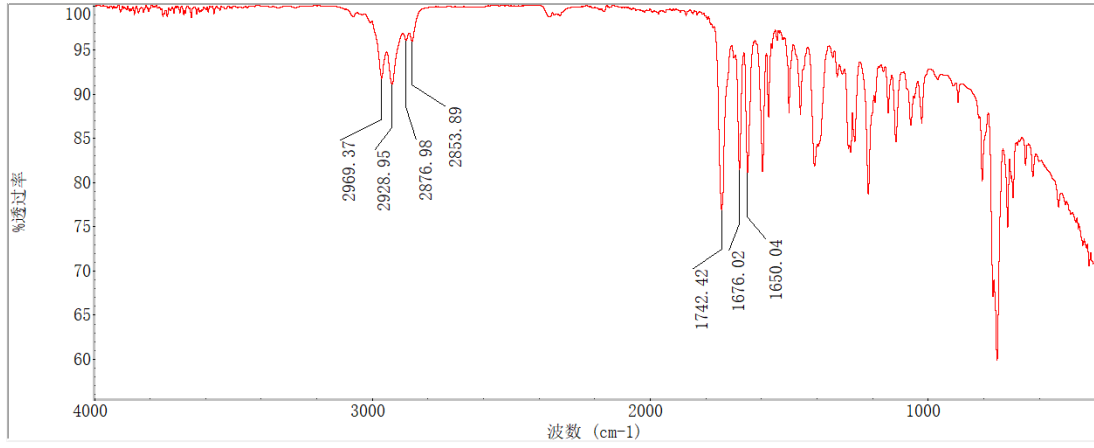

8.135  
8.118  
8.109  
8.107  
8.053  
8.051  
8.045  
8.027  
8.021  
7.763  
7.752  
7.740  
7.738  
7.718  
7.293  
7.270

4.103  
4.078  
4.054

1.923  
1.693  
1.682  
1.640  
1.361  
1.342  
1.338  
1.328  
1.313  
1.309  
1.296  
1.264  
1.227  
1.227  
0.887  
0.882  
0.868  
0.858

<sup>1</sup>H NMR in CDCl<sub>3</sub> for **3ae**

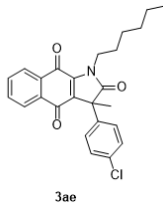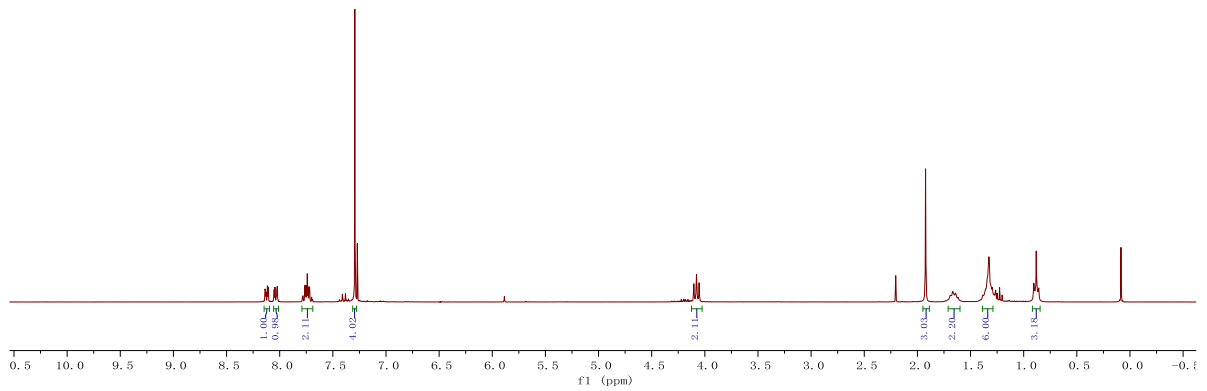

179.974  
178.362  
176.229

146.237  
136.138  
135.142  
133.445  
132.794  
131.656  
131.909  
130.625  
129.908  
129.612  
127.174  
126.097  
125.935

52.639

41.602

35.689  
30.138  
25.978  
22.163  
21.498

13.589

### $^{13}\text{C}$ NMR in $\text{CDCl}_3$ for **3ae**

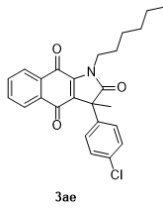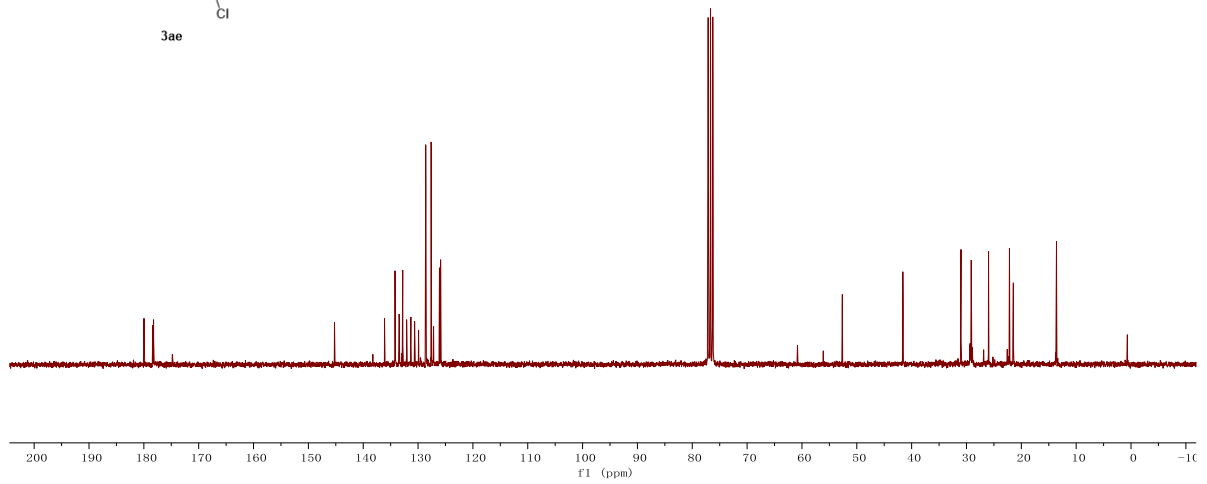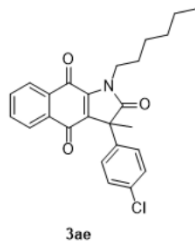

### IR (KBr) sepctrum for compound **3ae**

Title \*星期日 6月 21 10:59:05 2020 (GMT+08:00)

星期五 7月 24 12:48:02 20

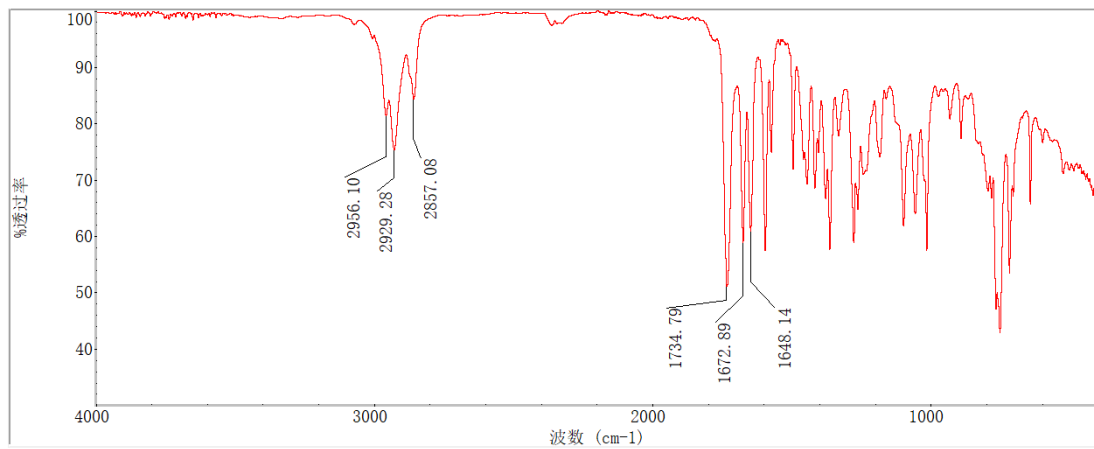



### Single crystallographic data for compound **3aa**.

Single crystals of  $C_{20}H_{15}NO_3$  (**3aa**) were obtained by slow evaporation of a solution containing **3aa** in the mixture of EtOH and DCM. A suitable crystal was selected and the crystal data and structure refinement results for compound **3aa** are listed in the Table S1.

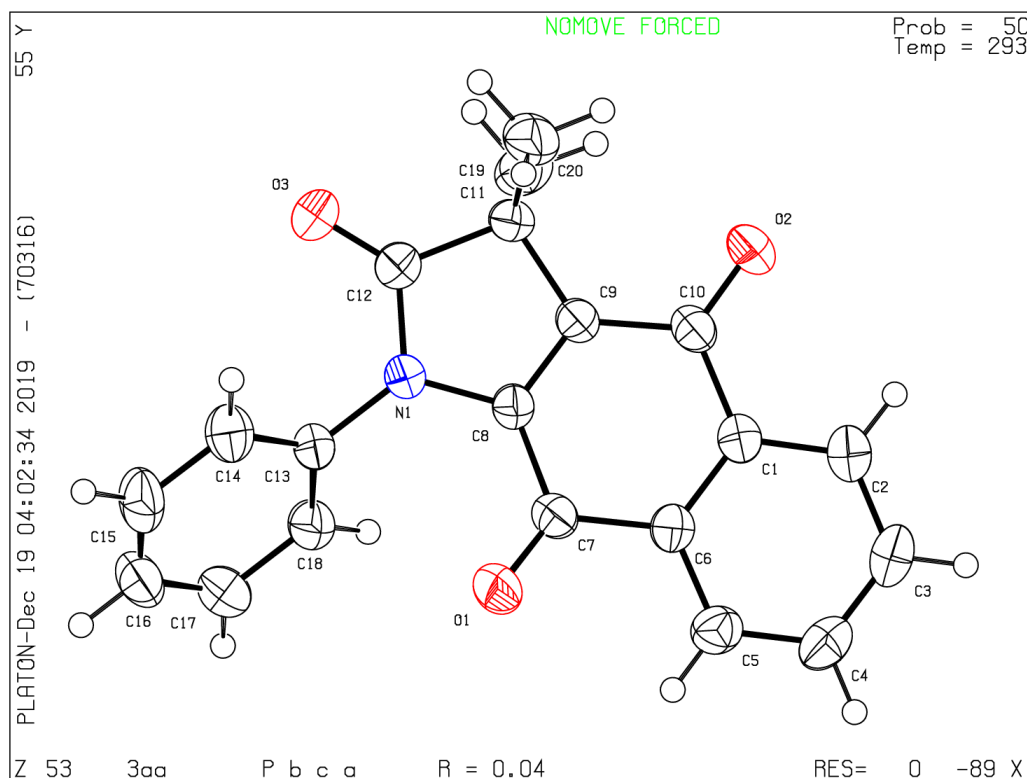

**Figure S1. ORTEP view of the compound **3aa** with thermal ellipsoids drawn at the 50% probability level**

**Table 1 Crystal data and structure refinement for **3aa**.**

|                     |                    |
|---------------------|--------------------|
| Identification code | 3AA                |
| Empirical formula   | $C_{20}H_{15}NO_3$ |
| Formula weight      | 317.33             |
| Temperature/K       | 293(2)             |
| Crystal system      | orthorhombic       |
| Space group         | Pbca               |
| a/Å                 | 13.5094(16)        |
| b/Å                 | 11.0920(9)         |

|                                               |                                                               |
|-----------------------------------------------|---------------------------------------------------------------|
| $c/\text{\AA}$                                | 21.2668(18)                                                   |
| $\alpha/^\circ$                               | 90                                                            |
| $\beta/^\circ$                                | 90                                                            |
| $\gamma/^\circ$                               | 90                                                            |
| Volume/ $\text{\AA}^3$                        | 3186.8(5)                                                     |
| Z                                             | 8                                                             |
| $\rho_{\text{calc}}/\text{g/cm}^3$            | 1.323                                                         |
| $\mu/\text{mm}^{-1}$                          | 0.089                                                         |
| F(000)                                        | 1328.0                                                        |
| Crystal size/ $\text{mm}^3$                   | $0.14 \times 0.13 \times 0.12$                                |
| Radiation                                     | Mo K $\alpha$ ( $\lambda = 0.71073$ )                         |
| $2\Theta$ range for data collection/ $^\circ$ | 4.876 to 49.99                                                |
| Index ranges                                  | $-16 \leq h \leq 10, -13 \leq k \leq 13, -25 \leq l \leq 24$  |
| Reflections collected                         | 8730                                                          |
| Independent reflections                       | 2800 [ $R_{\text{int}} = 0.0298, R_{\text{sigma}} = 0.0335$ ] |
| Data/restraints/parameters                    | 2800/0/219                                                    |
| Goodness-of-fit on $F^2$                      | 1.075                                                         |
| Final R indexes [ $I \geq 2\sigma(I)$ ]       | $R_1 = 0.0446, wR_2 = 0.1005$                                 |
| Final R indexes [all data]                    | $R_1 = 0.0607, wR_2 = 0.1093$                                 |
| Largest diff. peak/hole / $e \text{\AA}^{-3}$ | 0.14/-0.20                                                    |
